# Supplementary material for: Structurally diverse Rh(i) and Mn(i) complexes derived from the new ambidentate indene ligand, (1-{iPr2P(S)}-2-{NMe2})C9H6
Source: Royal Society of Chemistry journal article supplement (doi:10.1039/b410328a), 2004-01-01
Supplement: b410328a.pdf [file b410328a.pdf]

**Structurally Diverse Rh(I) and Mn(I) Complexes Derived from the New Ambidentate  
Indene Ligand, (1-{<sup>t</sup>Pr<sub>2</sub>P(S)}-2-{NMe<sub>2</sub>})C<sub>9</sub>H<sub>6</sub>**

**Dominik Wechsler,<sup>a</sup> Robert McDonald,<sup>b</sup> Michael J. Ferguson,<sup>b</sup>  
and Mark Stradiotto\*<sup>a</sup>**

<sup>a</sup> *Department of Chemistry, Dalhousie University, Halifax, Nova Scotia, Canada  
B3H 4J3. Fax: 1-902-494-1310; Tel: 1-902-494-7190; E-mail:  
mark.stradiotto@dal.ca*

<sup>b</sup> *X-Ray Crystallography Laboratory, Department of Chemistry, University of  
Alberta, Edmonton, Alberta, Canada T6G 2G2.*

**ELECTRONIC SUPPLEMENTARY INFORMATION**

**Experimental Section**

- Table 1a.** Crystallographic Experimental Details for **2**.  
**Table 2a.** Atomic Coordinates and Equivalent Isotropic Displacement Parameters for **2**.  
**Table 3a.** Selected Interatomic Distances for **2**.  
**Table 4a.** Selected Interatomic Angles for **2**.  
**Table 5a.** Torsional Angles for **2**.  
**Table 6a.** Least-Squares Planes for **2**.  
**Table 7a.** Anisotropic Displacement Parameters for **2**.  
**Table 8a.** Derived Atomic Coordinates and Displacement Parameters for Hydrogen Atoms for **2**.  
**Table 1b.** Crystallographic Experimental Details for **4**.  
**Table 2b.** Atomic Coordinates and Equivalent Isotropic Displacement Parameters for **4**.  
**Table 3b.** Selected Interatomic Distances for **4**.  
**Table 4b.** Selected Interatomic Angles for **4**.  
**Table 5b.** Torsional Angles for **4**.  
**Table 6b.** Least-Squares Planes for **4**.  
**Table 7b.** Anisotropic Displacement Parameters for **4**.  
**Table 8b.** Derived Atomic Coordinates and Displacement Parameters for Hydrogen Atoms for **4**.  
**Table 1c.** Crystallographic Experimental Details for **5**.  
**Table 2c.** Atomic Coordinates and Equivalent Isotropic Displacement Parameters for **5**.  
**Table 3c.** Selected Interatomic Distances for **5**.  
**Table 4c.** Selected Interatomic Angles for **5**.  
**Table 5c.** Torsional Angles for **5**.  
**Table 6c.** Least-Squares Planes for **5**.  
**Table 7c.** Anisotropic Displacement Parameters for **5**.  
**Table 8c.** Derived Atomic Coordinates and Displacement Parameters for Hydrogen Atoms for **5**.

## Experimental Section

**General Considerations.** All manipulations were conducted in the absence of oxygen and water under an atmosphere of dinitrogen, either by using standard Schlenk methods or within an mBraun Inc. glovebox apparatus, utilizing glassware that was oven-dried (130 °C) and evacuated while hot prior to use. Celite (Aldrich) was oven dried (130 °C) for 5 days and then evacuated for 24 h prior to use. Alumina (Aldrich, neutral, 150 mesh, activity Brockmann II) was degassed and dehydrated *in vacuo* for 48 h at temperatures between 200 and 300 °C and subsequently deactivated with 2% deionized water under argon prior to use. All non-deuterated solvents were deoxygenated and dried by sparging with N<sub>2</sub> gas, followed by passage through a double-column solvent purification system provided by mBraun Inc. Dichloromethane and tetrahydrofuran were purified over two alumina-packed columns, while toluene and pentane were purified over one alumina-packed column and one column packed with copper-Q5 reactant. The solvents used within the glovebox were stored over activated 3Å molecular sieves. C<sub>6</sub>D<sub>6</sub> (Aldrich) was degassed by using three repeated freeze-pump-thaw cycles and then dried over 3Å molecular sieves for 24 h prior to use. CDCl<sub>3</sub> (Aldrich) was degassed by using three repeated freeze-pump-thaw cycles, dried over CaH<sub>2</sub> for 7 d, and distilled *in vacuo*. Sulfur powder, *n*-BuLi (1.6 M in hexanes), NaN(SiMe<sub>3</sub>)<sub>2</sub>, and BrMn(CO)<sub>5</sub> were obtained from Aldrich and were used as received, while [CODRhCl]<sub>2</sub> (COD = η<sup>4</sup>-(1,5-cyclooctadiene)) was obtained from Strem and was dried *in vacuo* for 24 h prior to use. 1-(Diisopropylphosphino)-2-(dimethylamino)indene (**1**) was prepared using literature methods.<sup>1</sup> Unless otherwise stated, <sup>1</sup>H and <sup>13</sup>C NMR data were collected at 300K on a Bruker AV-500 spectrometer operating at 500.1 and 125.8 MHz, respectively, with chemical shifts reported in parts per million downfield of tetramethylsilane. In some cases, slightly fewer than expected independent <sup>1</sup>H or <sup>13</sup>C NMR resonances were observed, despite prolonged data acquisition times. <sup>1</sup>H and <sup>13</sup>C NMR chemical shift assignments are based on data obtained from <sup>1</sup>H-<sup>13</sup>C HSQC and <sup>1</sup>H-<sup>13</sup>C HMBC NMR experiments.<sup>2</sup> Unless otherwise stated, <sup>31</sup>P NMR data were collected at 298K on a Bruker AC-250 spectrometer operating at 101.3 MHz, with signals referenced externally to 85% H<sub>3</sub>PO<sub>4</sub> in water. Variable-temperature <sup>1</sup>H and <sup>31</sup>P NMR studies involving **3** were also conducted on a Bruker AC-250 spectrometer, with temperature calibrations carried out using an external MeOH/MeOD standard.<sup>2</sup> The Δ*G*<sup>‡</sup> value quoted for the dynamic process involving **3** was determined at 279K by use of the Gutowsky-Holm approximation.<sup>2,3</sup> IR spectra were collected on a Bruker VECTOR 22 FT-IR instrument, using Nujol mulls. Elemental analyses were performed by Canadian Microanalytical Service Ltd., Delta, British Columbia, Canada.

**Preparation of 1-(diisopropylphosphine sulfide)-2-(dimethylamino)indene (**2**).** A Schlenk flask containing a magnetic stir bar was charged with 1-(diisopropylphosphino)-2-(dimethylamino)indene (**1**) (0.73 g, 2.7 mmol) and then was sealed with a septum. Magnetic stirring was initiated and then a suspension of sulfur (0.12 g, 3.8 mmol) in dichloromethane (20 mL) was transferred *via* cannula to the Schlenk flask containing **1**. Upon completion of the slurry transfer, the resulting mixture was stirred for 1 h; at this stage, <sup>31</sup>P NMR data obtained from the reaction mixture indicated clean conversion to **2**. The dichloromethane and other volatile materials were then removed *in vacuo*. Within the glovebox, the residual solid was dissolved in toluene (15 mL) and passed down an alumina column (0.5 cm x 5 cm). Removal of the toluene and other volatile materials *in vacuo* yielded **2** as an analytically pure yellow solid (0.71 g, 2.3 mmol, 87%). Anal. Calcd for C<sub>17</sub>H<sub>26</sub>PSN: C 66.44; H 8.52; N 4.56. Found: C 66.46; H 8.59; N 4.72. <sup>1</sup>H NMR (C<sub>6</sub>D<sub>6</sub>): δ 7.61 (d, <sup>3</sup>*J*<sub>HH</sub> = 7.4 Hz, 1H, C4-H), 7.19 (t, <sup>3</sup>*J*<sub>HH</sub> = 7.5 Hz, 1H, C5-H),

7.06 (d,  $^3J_{\text{HH}} = 7.4$  Hz, 1H, C7-H), 6.92 (t,  $^3J_{\text{HH}} = 7.7$  Hz, 1H, C6-H), 5.44 (s, 1H, C3-H), 4.19 (d,  $^2J_{\text{PH}} = 17.6$  Hz, 1H, C1-H), 2.49 (s, 6H, NMe<sub>2</sub>), 2.28-2.16 (m, 2H, P(CHMe<sub>2</sub>)), 1.19 (d of d,  $^3J_{\text{PH}} = 16.9$  Hz,  $^3J_{\text{HH}} = 7.0$  Hz, 3H, P(CHMe<sub>a</sub>Me<sub>b</sub>)), 0.99 (d of d,  $^3J_{\text{PH}} = 17.0$  Hz,  $^3J_{\text{HH}} = 7.1$  Hz, 3H, P(CHMe<sub>c</sub>Me<sub>d</sub>)), 0.93 (d of d,  $^3J_{\text{PH}} = 16.7$  Hz,  $^3J_{\text{HH}} = 6.9$  Hz, 3H, P(CHMe<sub>a</sub>Me<sub>b</sub>)), 0.79 (d of d,  $^3J_{\text{PH}} = 16.6$  Hz,  $^3J_{\text{HH}} = 7.0$  Hz, 3H, P(CHMe<sub>c</sub>Me<sub>d</sub>));  $^{13}\text{C}\{^1\text{H}\}$  NMR (C<sub>6</sub>D<sub>6</sub>):  $\delta$  158.6 (d,  $^2J_{\text{PC}} = 5.0$  Hz, C2), 146.5 (d,  $^3J_{\text{PC}} = 3.8$  Hz, C3a), 135.4 (d,  $^2J_{\text{PC}} = 4.6$  Hz, C7a), 127.5 (C5), 125.2 (d,  $^4J_{\text{PC}} = 2.7$  Hz, C4), 121.3 (d,  $^4J_{\text{PC}} = 1.9$  Hz, C6), 118.5 (C7), 105.7 (d,  $^3J_{\text{PC}} = 3.8$  Hz, C3), 50.6 (d,  $^1J_{\text{PC}} = 30.2$  Hz, C1), 43.5 (s, NMe<sub>2</sub>), 26.4 (d,  $^1J_{\text{PC}} = 45.5$  Hz, P(CHMe<sub>2</sub>)), 26.3 (d,  $^1J_{\text{PC}} = 47.4$  Hz, P(CHMe<sub>2</sub>)), 18.4 (d,  $^2J_{\text{PC}} = 1.9$  Hz, P(CHMe<sub>c</sub>Me<sub>d</sub>)), 17.2 (d,  $^2J_{\text{PC}} = 2.3$  Hz, P(CHMe<sub>a</sub>Me<sub>b</sub>)), 16.8 (d,  $^2J_{\text{PC}} = 2.7$  Hz, P(CHMe<sub>c</sub>Me<sub>d</sub>)), 16.5 (d,  $^2J_{\text{PC}} = 1.9$  Hz, P(CHMe<sub>a</sub>Me<sub>b</sub>));  $^{31}\text{P}\{^1\text{H}\}$  NMR (C<sub>6</sub>D<sub>6</sub>):  $\delta$  72.8. Crystals of **2** suitable for single-crystal X-ray diffraction analysis were grown from toluene at -35 °C.

**Preparation of  $[\kappa^2\text{-N,S-(1-}i\text{-Pr}_2\text{PS-2-Me}_2\text{N-indene)RhCOD}]^+\text{BF}_4^-$  (**3**).** To a glass vial containing a magnetically stirred suspension of [RhCODCl]<sub>2</sub> (0.094 g, 0.19 mmol) in THF (2 mL) was added a suspension of AgBF<sub>4</sub> (0.075 g, 0.38 mmol) in THF (3 mL); a yellow solution was generated immediately along with a white precipitate. The supernatant solution was separated from the precipitate by filtration through Celite, and the solution was transferred to a glass vial containing a magnetically stirred solution of compound **2** (0.12 g, 0.38 mmol) in THF (3 mL); after 30 s, a dark orange-red precipitate started to form. After 3 additional hours, the reaction supernatant solution was decanted and the remaining solid (**3**) was washed with pentane (3 mL). Any remaining solvent or other volatile materials were then removed *in vacuo*, yielding **3** as an analytically pure orange-red solid (0.18 g, 0.29 mmol, 76%). Anal. Calcd for C<sub>25</sub>H<sub>38</sub>PSNRhBF<sub>4</sub>: C 49.61; H 6.33; N 2.31. Found: C 49.78; H 6.54; N 2.34.  $^1\text{H}$  NMR (CDCl<sub>3</sub>):  $\delta$  7.20-7.15 (m, 2H, aryl-Hs), 7.10 (d,  $^3J_{\text{HH}} = 7.0$  Hz, 1H, C4-H or C7-H), 6.96 (t, 1H, C5-H or C6-H), 5.21 (d,  $^2J_{\text{PH}} = 8.6$  Hz, 1H, C1-H), 4.37 (m, 2H, COD), 4.08 (m, 2H, COD), 3.31 (broad s, 6H, NMe<sub>2</sub>), 2.82 (m, 1H, P(CHMe<sub>2</sub>)), 2.53 (m, 1H, P(CHMe<sub>2</sub>) or COD), 2.41 (m, 2H, P(CHMe<sub>2</sub>) and/or COD), 2.18 (broad m, 2H, COD), 1.98 (broad m, 2H, COD), 1.70 (broad m, 2H, COD), 1.44 (d of d,  $^3J_{\text{PH}} = 18.4$  Hz,  $^3J_{\text{HH}} = 6.9$  Hz, 3H, P(CHMe<sub>2</sub>)), 1.39-1.32 (m, 6H, P(CHMe<sub>2</sub>)), 0.96 (d of d,  $^3J_{\text{PH}} = 17.5$  Hz,  $^3J_{\text{HH}} = 7.0$  Hz, 3H, P(CHMe<sub>2</sub>));  $^{13}\text{C}\{^1\text{H}\}$  NMR (CDCl<sub>3</sub>):  $\delta$  145.8 (C3a or C7a), 131.0 (C7a or C3a), 129.4 (aryl-CH), 124.6 (aryl-CH), 123.7 (aryl-CH), 119.8 (aryl-CH), 84.6 (m, COD), 82.2 (m, COD), 47.8 (d,  $J = 26.8$  Hz, C1), 44.6 (broad m, NMe<sub>2</sub>), 32.6 (broad m), 30.8, (d,  $J = 40.0$  Hz), 30.0 (d,  $J = 36.1$  Hz), 29.9-29.5 (broad m), 17.8 (P(CHMe<sub>2</sub>)), 17.5 (P(CHMe<sub>2</sub>)), 17.4 (P(CHMe<sub>2</sub>)), 16.5 (P(CHMe<sub>2</sub>));  $^{31}\text{P}\{^1\text{H}\}$  NMR (CDCl<sub>3</sub>):  $\delta$  103.5.

**Preparation of  $\kappa^2\text{-C,S-(1-}i\text{-Pr}_2\text{PS-2-Me}_2\text{N-indenyl)RhCOD}$  (**4**).** To a magnetically stirred suspension of **3** (0.069 g, 0.11 mmol) in THF (3 mL) was added a suspension of NaN(SiMe<sub>3</sub>)<sub>2</sub> (0.021 g, 0.11 mmol) in THF (3 mL) *via* Pasteur pipette. Some precipitate formed upon addition and the reaction mixture was left stirring for 3 h. A  $^{31}\text{P}$  NMR spectrum taken of the reaction solution revealed the presence of a single phosphorus-containing product at 82.9 ppm. After the solvent and other volatile materials were removed *in vacuo*, the residue was extracted with pentane (3 mL) and the pentane solution containing **4** was filtered through Celite and then dried *in vacuo*. The residue was then taken up in toluene (3 mL) and crystallized at -35 °C, giving **4** as an analytically pure yellow solid (0.040 g, 0.077 mmol, 70%). Anal. Calcd for C<sub>25</sub>H<sub>37</sub>PSNRh: C 58.02; H 7.21; N 2.71. Found: C 57.88; H 6.94; N 2.63.  $^1\text{H}$  NMR (C<sub>6</sub>D<sub>6</sub>):  $\delta$  8.26 (d,  $^3J_{\text{HH}} = 7.2$  Hz, 1H, C4-H or C7-H), 7.44 (d,  $^3J_{\text{HH}} = 7.0$  Hz, 1H, C7-H or C4-H), 7.23-7.15 (m, 2H, C5-H and C6-H), 6.16 (s, 1H, C3-H), 4.50 (broad m, 2H, COD), 4.30 (broad s, 2H, COD), 3.35 (m, 1H,

P(CHMe<sub>2</sub>), 3.13 (s, 6H, NMe<sub>2</sub>), 2.73 (m, 1H, P(CHMe<sub>2</sub>)), 2.50-1.15 (m, 11H, COD and P(CHMe<sub>2</sub>)), 1.07 (d of d, <sup>3</sup>J<sub>PH</sub> = 16.9 Hz, <sup>3</sup>J<sub>HH</sub> = 7.1 Hz, 3H, P(CHMe<sub>2</sub>)), 0.82 (d of d, <sup>3</sup>J<sub>PH</sub> = 17.1 Hz, <sup>3</sup>J<sub>HH</sub> = 7.2 Hz, 3H, P(CHMe<sub>2</sub>)), 0.67 (d of d, <sup>3</sup>J<sub>PH</sub> = 16.9 Hz, <sup>3</sup>J<sub>HH</sub> = 7.2 Hz, 3H, P(CHMe<sub>2</sub>)); <sup>13</sup>C{<sup>1</sup>H} NMR (C<sub>6</sub>D<sub>6</sub>): δ 161.9 (d, *J* = 1.8 Hz, C2), 138.2 (d, *J* = 9.5 Hz, C3a or C7a), 137.1 (d, *J* = 4.1 Hz, C7a or C3a), 120.8 (C4 or C7), 120.1 (C5 or C6), 117.4 (C7 or C4), 117.3 (C6 or C5), 103.6 (d, <sup>3</sup>J<sub>PC</sub> = 8.2 Hz, C3), 80.4-77.3 (m, COD), 76.5 (d, <sup>1</sup>J<sub>RhC</sub> = 13.9 Hz, COD), 45.9 (NMe<sub>2</sub>), 31.4 (d, <sup>1</sup>J<sub>PC</sub> = 31.9 Hz, P(CHMe<sub>2</sub>)), 29.2-28.2 (m, COD and P(CHMe<sub>2</sub>)), 26.5 (d of d, <sup>1</sup>J<sub>PC</sub> = 47.4 Hz, <sup>1</sup>J<sub>RhC</sub> = 11.2 Hz, C1), 15.1 (2 P(CHMe<sub>2</sub>)), 14.9 (P(CHMe<sub>2</sub>)), 14.4 (P(CHMe<sub>2</sub>)); <sup>31</sup>P{<sup>1</sup>H} NMR (C<sub>6</sub>D<sub>6</sub>): δ 82.9. Crystals of **4** suitable for single-crystal X-ray diffraction analysis were grown from diethyl ether at -35 °C.

**Preparation of η<sup>5</sup>-(3-<sup>i</sup>Pr<sub>2</sub>PS-2-Me<sub>2</sub>N-indenyl)Mn(CO)<sub>3</sub> (**5**).** A 1.6M hexanes solution (pre-cooled to -35 °C) of *n*-BuLi (0.20 mL, 0.32 mmol) was added dropwise *via* syringe to a glass vial containing a magnetically stirred solution (pre-cooled to -35 °C) of **2** (0.099 g, 0.32 mmol) in toluene (5 mL) over 2 min, producing a faint yellow solution. The vial containing the reaction mixture was then sealed with a PTFE-lined cap and left to stir for 1.5 h at ambient temperature; the clean lithiation of **2** was monitored *in situ* by the disappearance of a <sup>31</sup>P NMR signal corresponding to **2**, and the appearance of a single new resonance at 54 ppm. A mixture of BrMn(CO)<sub>5</sub> (0.089 g, 0.32 mmol) in toluene (5 mL) was then transferred to the reaction mixture *via* Pasteur pipette, and the reaction vial was re-sealed. A dark solution formed immediately and after stirring for 3 d the solution changed to a yellow-orange color and a white precipitate formed. The reaction mixture was then filtered through Celite and the supernatant was dried *in vacuo*, yielding **5** as an analytically pure orange solid (0.14 g, 0.31 mmol, 96%). Anal. Calcd for C<sub>20</sub>H<sub>25</sub>PSNO<sub>3</sub>Mn: C 53.93; H 5.66; N 3.14. Found: C 53.61; H 5.72; N 3.26. <sup>1</sup>H NMR (C<sub>6</sub>D<sub>6</sub>): δ 9.42 (d, <sup>3</sup>J<sub>HH</sub> = 8.0 Hz, 1H, C4-H or C7-H), 7.06 (d, <sup>3</sup>J<sub>HH</sub> = 8.1 Hz, 1H, C7-H or C4-H), 6.80-6.72 (m, 2H, C5-H and C6-H), 4.46 (s, 1H, C1-H), 3.16 (m, 1H, P(CHMe<sub>2</sub>)), 2.18 (m, 1H, P(CHMe<sub>2</sub>)), 2.09 (s, 6H, NMe<sub>2</sub>), 1.77 (d of d, <sup>3</sup>J<sub>PH</sub> = 18.6 Hz, <sup>3</sup>J<sub>HH</sub> = 6.0 Hz, 3H, P(CHMe<sub>2</sub>)), 1.31 (d of d, <sup>3</sup>J<sub>PH</sub> = 17.3 Hz, <sup>3</sup>J<sub>HH</sub> = 5.7 Hz, 3H, P(CHMe<sub>2</sub>)), 1.08 (d of d, <sup>3</sup>J<sub>PH</sub> = 17.9 Hz, <sup>3</sup>J<sub>HH</sub> = 6.8 Hz, 3H, P(CHMe<sub>2</sub>)), 1.77 (d of d, <sup>3</sup>J<sub>PH</sub> = 17.1 Hz, <sup>3</sup>J<sub>HH</sub> = 6.7 Hz, 3H, P(CHMe<sub>2</sub>)); <sup>13</sup>C{<sup>1</sup>H} NMR (C<sub>6</sub>D<sub>6</sub>): δ 223.7 (CO), 138.7 (C2), 129.0 (C4 or C7), 127.1 (C5 or C6), 126.1 (C6 or C5), 124.7 (C7 or C4), 105.5 (d, *J* = 7.3 Hz, C7a or C3a), 100.0 (d, *J* = 7.6 Hz, C3a or C7a), 61.5 (C1), 46.2 (NMe<sub>2</sub>), 30.7 (m, P(CHMe<sub>2</sub>)), 28.0 (m, P(CHMe<sub>2</sub>)), 19.6 (P(CHMe<sub>2</sub>)), 19.2 (P(CHMe<sub>2</sub>)), 18.5 (P(CHMe<sub>2</sub>)), 17.2 (P(CHMe<sub>2</sub>)); <sup>31</sup>P{<sup>1</sup>H} NMR (C<sub>6</sub>D<sub>6</sub>): δ 64.4. FTIR (cm<sup>-1</sup>) ν(CO): 2014, 1945, 1931. Crystals of **5** suitable for single-crystal X-ray diffraction analysis were grown from diethyl ether at -35 °C.

## References:

1. M. Stradiotto, J. Cipot and R. McDonald *J. Am. Chem. Soc.* 2003, **125**, 5618.
2. S. Braun, H.-O. Kalinowski and S. Berger *150 and More Basic NMR Experiments*; Wiley-VCH: Toronto, 1998.
3. H. S. Gutowsky and C. H. Holm *J. Chem. Phys.* 1956, **25**, 1228.

**Table 1a.** Crystallographic Experimental Details for **2**.

|                                                         |                                                                              |
|---------------------------------------------------------|------------------------------------------------------------------------------|
| <i>A. Crystal Data</i>                                  |                                                                              |
| formula                                                 | C <sub>17</sub> H <sub>26</sub> NPS                                          |
| formula weight                                          | 307.42                                                                       |
| crystal dimensions (mm)                                 | 0.51 × 0.14 × 0.12                                                           |
| crystal system                                          | orthorhombic                                                                 |
| space group                                             | <i>Pbca</i> (No. 61)                                                         |
| unit cell parameters <sup>a</sup>                       |                                                                              |
| <i>a</i> (Å)                                            | 17.3157 (19)                                                                 |
| <i>b</i> (Å)                                            | 10.8344 (12)                                                                 |
| <i>c</i> (Å)                                            | 17.787 (2)                                                                   |
| <i>V</i> (Å <sup>3</sup> )                              | 3337.0 (6)                                                                   |
| <i>Z</i>                                                | 8                                                                            |
| $\rho_{\text{calcd}}$ (g cm <sup>-3</sup> )             | 1.224                                                                        |
| $\mu$ (mm <sup>-1</sup> )                               | 0.281                                                                        |
| <i>B. Data Collection and Refinement Conditions</i>     |                                                                              |
| diffractometer                                          | Bruker PLATFORM/SMART 1000 CCD <sup>b</sup>                                  |
| radiation ( $\lambda$ [Å])                              | graphite-monochromated Mo K $\alpha$ (0.71073)                               |
| temperature (°C)                                        | -80                                                                          |
| scan type                                               | $\omega$ scans (0.3°) (20 s exposures)                                       |
| data collection $2\theta$ limit (deg)                   | 52.84                                                                        |
| total data collected                                    | 22338 ( $-21 \leq h \leq 21$ , $-13 \leq k \leq 13$ , $-21 \leq l \leq 22$ ) |
| independent reflections                                 | 3424 ( $R_{\text{int}} = 0.0440$ )                                           |
| number of observed reflections ( <i>NO</i> )            | 2883 [ $F_o^2 \geq 2\sigma(F_o^2)$ ]                                         |
| structure solution method                               | direct methods ( <i>SHELXS-86</i> <sup>c</sup> )                             |
| refinement method                                       | full-matrix least-squares on $F^2$ ( <i>SHELXL-93</i> <sup>d</sup> )         |
| absorption correction method                            | multi-scan ( <i>SADABS</i> )                                                 |
| range of transmission factors                           | 0.9670--0.8698                                                               |
| data/restraints/parameters                              | 3424 [ $F_o^2 \geq -3\sigma(F_o^2)$ ] / 0 / 187                              |
| goodness-of-fit ( <i>S</i> ) <sup>e</sup>               | 1.064 [ $F_o^2 \geq -3\sigma(F_o^2)$ ]                                       |
| final <i>R</i> indices <sup>f</sup>                     |                                                                              |
| <i>R</i> <sub>1</sub> [ $F_o^2 \geq 2\sigma(F_o^2)$ ]   | 0.0338                                                                       |
| <i>wR</i> <sub>2</sub> [ $F_o^2 \geq -3\sigma(F_o^2)$ ] | 0.0887                                                                       |
| largest difference peak and hole                        | 0.433 and -0.178 e Å <sup>-3</sup>                                           |

<sup>a</sup>Obtained from least-squares refinement of 4392 reflections with  $4.58^\circ < 2\theta < 52.70^\circ$ .

<sup>b</sup>Programs for diffractometer operation, data collection, data reduction and absorption correction were those supplied by Bruker. (continued)

**Table 1a.** Crystallographic Experimental Details for **2**. (continued)

<sup>c</sup>Sheldrick, G. M. *Acta Crystallogr.* **1990**, *A46*, 467–473.

<sup>d</sup>Sheldrick, G. M. *SHELXL-93*. Program for crystal structure determination. University of Göttingen, Germany, 1993. Refinement on  $F_o^2$  for all reflections (all of these having  $F_o^2 \geq -3\sigma(F_o^2)$ ). Weighted  $R$ -factors  $wR_2$  and all goodnesses of fit  $S$  are based on  $F_o^2$ ; conventional  $R$ -factors  $R_1$  are based on  $F_o$ , with  $F_o$  set to zero for negative  $F_o^2$ . The observed criterion of  $F_o^2 > 2\sigma(F_o^2)$  is used only for calculating  $R_1$ , and is not relevant to the choice of reflections for refinement.  $R$ -factors based on  $F_o^2$  are statistically about twice as large as those based on  $F_o$ , and  $R$ -factors based on ALL data will be even larger.

<sup>e</sup> $S = [\sum w(F_o^2 - F_c^2)^2 / (n - p)]^{1/2}$  ( $n$  = number of data;  $p$  = number of parameters varied;  $w = [\sigma^2(F_o^2) + (0.0415P)^2 + 1.3507P]^{-1}$  where  $P = [\text{Max}(F_o^2, 0) + 2F_c^2]/3$ ).

<sup>f</sup> $R_1 = \sum ||F_o| - |F_c|| / \sum |F_o|$ ;  $wR_2 = [\sum w(F_o^2 - F_c^2)^2 / \sum w(F_o^4)]^{1/2}$ .

**Table 2a.** Atomic Coordinates and Equivalent Isotropic Displacement Parameters for **2**.

| Atom | <i>x</i>     | <i>y</i>    | <i>z</i>     | <i>U</i> <sub>eq</sub> , Å <sup>2</sup> |
|------|--------------|-------------|--------------|-----------------------------------------|
| P    | 0.01997(2)   | 0.28897(3)  | 0.10468(2)   | 0.02134(11)*                            |
| S    | -0.05663(2)  | 0.41442(4)  | 0.13340(3)   | 0.03408(13)*                            |
| N    | 0.17391(7)   | 0.18671(12) | -0.00144(7)  | 0.0264(3)*                              |
| C1   | 0.11556(8)   | 0.35876(13) | 0.07984(8)   | 0.0219(3)*                              |
| C2   | 0.17926(8)   | 0.26611(14) | 0.05988(8)   | 0.0239(3)*                              |
| C3   | 0.23575(9)   | 0.26916(15) | 0.11225(9)   | 0.0274(3)*                              |
| C3A  | 0.21944(9)   | 0.36460(15) | 0.16718(9)   | 0.0263(3)*                              |
| C4   | 0.26157(10)  | 0.40317(16) | 0.22964(9)   | 0.0334(4)*                              |
| C5   | 0.23484(10)  | 0.50327(18) | 0.27041(9)   | 0.0375(4)*                              |
| C6   | 0.16770(10)  | 0.56414(16) | 0.25023(10)  | 0.0355(4)*                              |
| C7   | 0.12402(9)   | 0.52452(15) | 0.18862(9)   | 0.0293(4)*                              |
| C7A  | 0.15012(9)   | 0.42388(14) | 0.14776(8)   | 0.0246(3)*                              |
| C8   | 0.23396(9)   | 0.09221(16) | -0.00513(10) | 0.0337(4)*                              |
| C9   | 0.16266(11)  | 0.24473(19) | -0.07476(9)  | 0.0388(4)*                              |
| C10  | -0.01352(9)  | 0.20292(14) | 0.02204(8)   | 0.0255(3)*                              |
| C11  | -0.08265(10) | 0.12073(17) | 0.04288(10)  | 0.0356(4)*                              |
| C12  | -0.03730(10) | 0.29090(17) | -0.04104(9)  | 0.0338(4)*                              |
| C13  | 0.03153(9)   | 0.17378(15) | 0.17944(9)   | 0.0291(3)*                              |
| C14  | 0.07885(11)  | 0.05986(17) | 0.15831(11)  | 0.0425(5)*                              |
| C15  | 0.05807(12)  | 0.22850(19) | 0.25434(10)  | 0.0448(5)*                              |

Anisotropically-refined atoms are marked with an asterisk (\*). The form of the anisotropic displacement parameter is:  $\exp[-2\pi^2(h^2a^{*2}U_{11} + k^2b^{*2}U_{22} + l^2c^{*2}U_{33} + 2klb^{*c^*}U_{23} + 2hla^{*c^*}U_{13} + 2hka^{*b^*}U_{12})]$ .

**Table 3a.** Selected Interatomic Distances (Å) for **2**.

| Atom1 | Atom2 | Distance   | Atom1 | Atom2 | Distance |
|-------|-------|------------|-------|-------|----------|
| P     | S     | 1.9665(6)  | C3A   | C4    | 1.393(2) |
| P     | C1    | 1.8728(15) | C3A   | C7A   | 1.405(2) |
| P     | C10   | 1.8347(15) | C4    | C5    | 1.384(3) |
| P     | C13   | 1.8346(16) | C5    | C6    | 1.384(3) |
| N     | C2    | 1.392(2)   | C6    | C7    | 1.399(2) |
| N     | C8    | 1.461(2)   | C7    | C7A   | 1.386(2) |
| N     | C9    | 1.461(2)   | C10   | C11   | 1.537(2) |
| C1    | C2    | 1.533(2)   | C10   | C12   | 1.529(2) |
| C1    | C7A   | 1.522(2)   | C13   | C14   | 1.528(2) |
| C2    | C3    | 1.351(2)   | C13   | C15   | 1.529(2) |
| C3    | C3A   | 1.450(2)   |       |       |          |

**Table 4a.** Selected Interatomic Angles (deg) for **2**.

| Atom1 | Atom2 | Atom3 | Angle      | Atom1 | Atom2 | Atom3 | Angle      |
|-------|-------|-------|------------|-------|-------|-------|------------|
| S     | P     | C1    | 112.23(5)  | C3    | C3A   | C4    | 130.47(15) |
| S     | P     | C10   | 110.25(5)  | C3    | C3A   | C7A   | 109.07(13) |
| S     | P     | C13   | 110.82(6)  | C4    | C3A   | C7A   | 120.42(15) |
| C1    | P     | C10   | 107.19(7)  | C3A   | C4    | C5    | 118.54(16) |
| C1    | P     | C13   | 110.44(7)  | C4    | C5    | C6    | 121.22(16) |
| C10   | P     | C13   | 105.64(7)  | C5    | C6    | C7    | 120.74(16) |
| C2    | N     | C8    | 114.89(13) | C6    | C7    | C7A   | 118.41(16) |
| C2    | N     | C9    | 116.26(13) | C1    | C7A   | C3A   | 108.62(13) |
| C8    | N     | C9    | 110.88(13) | C1    | C7A   | C7    | 130.75(15) |
| P     | C1    | C2    | 115.23(10) | C3A   | C7A   | C7    | 120.63(15) |
| P     | C1    | C7A   | 110.33(10) | P     | C10   | C11   | 110.32(11) |
| C2    | C1    | C7A   | 101.80(12) | P     | C10   | C12   | 110.88(11) |
| N     | C2    | C1    | 122.55(13) | C11   | C10   | C12   | 109.18(13) |
| N     | C2    | C3    | 127.11(14) | P     | C13   | C14   | 115.44(12) |
| C1    | C2    | C3    | 110.20(13) | P     | C13   | C15   | 113.62(12) |
| C2    | C3    | C3A   | 109.93(14) | C14   | C13   | C15   | 111.49(15) |



**Table 5a.** Torsional Angles (deg) for **2**.

| Atom1 | Atom2 | Atom3 | Atom4 | Angle       | Atom1 | Atom2 | Atom3 | Atom4 | Angle       |
|-------|-------|-------|-------|-------------|-------|-------|-------|-------|-------------|
| S     | P     | C1    | C2    | 177.64(9)   | P     | C1    | C2    | C3    | -113.61(13) |
| S     | P     | C1    | C7A   | 63.08(11)   | C7A   | C1    | C2    | N     | -178.17(13) |
| C10   | P     | C1    | C2    | -61.17(12)  | C7A   | C1    | C2    | C3    | 5.79(16)    |
| C10   | P     | C1    | C7A   | -175.73(10) | P     | C1    | C7A   | C3A   | 116.89(12)  |
| C13   | P     | C1    | C2    | 53.44(13)   | P     | C1    | C7A   | C7    | -63.12(19)  |
| C13   | P     | C1    | C7A   | -61.12(12)  | C2    | C1    | C7A   | C3A   | -5.91(15)   |
| S     | P     | C10   | C11   | -69.54(12)  | C2    | C1    | C7A   | C7    | 174.08(15)  |
| S     | P     | C10   | C12   | 51.54(12)   | N     | C2    | C3    | C3A   | -179.41(14) |
| C1    | P     | C10   | C11   | 168.04(11)  | C1    | C2    | C3    | C3A   | -3.58(17)   |
| C1    | P     | C10   | C12   | -70.89(12)  | C2    | C3    | C3A   | C4    | -178.41(16) |
| C13   | P     | C10   | C11   | 50.25(13)   | C2    | C3    | C3A   | C7A   | -0.42(18)   |
| C13   | P     | C10   | C12   | 171.32(11)  | C3    | C3A   | C4    | C5    | 175.77(16)  |
| S     | P     | C13   | C14   | 169.86(11)  | C7A   | C3A   | C4    | C5    | -2.0(2)     |
| S     | P     | C13   | C15   | -59.55(14)  | C3    | C3A   | C7A   | C1    | 4.23(16)    |
| C1    | P     | C13   | C14   | -65.13(14)  | C3    | C3A   | C7A   | C7    | -175.76(13) |
| C1    | P     | C13   | C15   | 65.46(14)   | C4    | C3A   | C7A   | C1    | -177.54(14) |
| C10   | P     | C13   | C14   | 50.45(14)   | C4    | C3A   | C7A   | C7    | 2.5(2)      |
| C10   | P     | C13   | C15   | -178.96(13) | C3A   | C4    | C5    | C6    | 0.2(2)      |
| C8    | N     | C2    | C1    | -170.92(13) | C4    | C5    | C6    | C7    | 1.2(3)      |
| C8    | N     | C2    | C3    | 4.4(2)      | C5    | C6    | C7    | C7A   | -0.8(2)     |
| C9    | N     | C2    | C1    | 57.24(19)   | C6    | C7    | C7A   | C1    | 178.99(15)  |
| C9    | N     | C2    | C3    | -127.42(17) | C6    | C7    | C7A   | C3A   | -1.0(2)     |
| P     | C1    | C2    | N     | 62.44(17)   |       |       |       |       |             |

**Table 6a.** Least-Squares Planes for **2**.

| Plane | Coefficients <sup>a</sup> |           |             |          | Defining Atoms with Deviations (Å) <sup>b</sup> |             |     |             |
|-------|---------------------------|-----------|-------------|----------|-------------------------------------------------|-------------|-----|-------------|
| 1     | 9.000(10)                 | 6.686(6)  | -10.509(10) | 2.642(4) | C3A                                             | 0.0136(11)  | C4  | -0.0058(11) |
|       |                           |           |             |          | C5                                              | -0.0056(12) | C6  | 0.0093(12)  |
|       |                           |           |             |          | C7                                              | -0.0014(11) | C7A | -0.0100(10) |
| 2     | 8.305(12)                 | 7.054(8)  | -10.464(15) | 2.668(5) | C3A                                             | -0.0231(9)  | C3  | 0.0139(5)   |
|       |                           |           |             |          | C1                                              | -0.0132(5)  | C7A | 0.0224(9)   |
| 3     | 8.224(14)                 | 7.661(14) | -9.32(3)    | 2.955(7) | C1                                              | C2          | C3  |             |
|       |                           |           |             |          | <u>N</u>                                        | -0.081(5)   |     |             |

Dihedral angle between planes 1 and 2: 3.02(13)°

Dihedral angle between planes 2 and 3: 4.9(2)°

<sup>a</sup>Coefficients are for the form  $ax+by+cz = d$  where  $x$ ,  $y$  and  $z$  are crystallographic coordinates.

<sup>b</sup>Underlined atoms were not included in the definition of the plane.

**Table 7a.** Anisotropic Displacement Parameters ( $U_{ij}$ , Å<sup>2</sup>) for **2**.

| Atom | $U_{11}$   | $U_{22}$   | $U_{33}$   | $U_{23}$     | $U_{13}$    | $U_{12}$     |
|------|------------|------------|------------|--------------|-------------|--------------|
| P    | 0.0196(2)  | 0.0242(2)  | 0.0202(2)  | -0.00121(15) | 0.00134(14) | -0.00063(14) |
| S    | 0.0256(2)  | 0.0340(2)  | 0.0427(3)  | -0.01074(18) | 0.00590(17) | 0.00334(17)  |
| N    | 0.0223(6)  | 0.0325(7)  | 0.0243(7)  | -0.0026(5)   | 0.0017(5)   | 0.0029(5)    |
| C1   | 0.0212(7)  | 0.0245(7)  | 0.0201(7)  | 0.0024(6)    | 0.0009(6)   | -0.0011(6)   |
| C2   | 0.0211(7)  | 0.0269(8)  | 0.0237(8)  | 0.0037(6)    | 0.0038(6)   | -0.0008(6)   |
| C3   | 0.0221(8)  | 0.0313(8)  | 0.0288(8)  | 0.0026(7)    | 0.0002(6)   | -0.0001(6)   |
| C3A  | 0.0233(7)  | 0.0306(8)  | 0.0250(8)  | 0.0038(6)    | 0.0008(6)   | -0.0062(6)   |
| C4   | 0.0291(9)  | 0.0416(10) | 0.0296(9)  | 0.0037(7)    | -0.0048(7)  | -0.0085(7)   |
| C5   | 0.0385(10) | 0.0479(10) | 0.0261(9)  | -0.0040(8)   | -0.0019(7)  | -0.0176(8)   |
| C6   | 0.0397(10) | 0.0356(9)  | 0.0312(9)  | -0.0083(7)   | 0.0079(7)   | -0.0134(8)   |
| C7   | 0.0287(8)  | 0.0289(8)  | 0.0303(9)  | -0.0011(7)   | 0.0043(7)   | -0.0060(7)   |
| C7A  | 0.0249(7)  | 0.0268(8)  | 0.0220(8)  | 0.0026(6)    | 0.0019(6)   | -0.0079(6)   |
| C8   | 0.0261(8)  | 0.0344(9)  | 0.0405(10) | -0.0062(7)   | 0.0026(7)   | 0.0034(7)    |
| C9   | 0.0424(10) | 0.0507(11) | 0.0234(9)  | -0.0010(8)   | 0.0020(7)   | 0.0090(9)    |
| C10  | 0.0243(8)  | 0.0294(8)  | 0.0229(8)  | -0.0037(6)   | 0.0003(6)   | -0.0005(6)   |
| C11  | 0.0330(9)  | 0.0397(9)  | 0.0339(9)  | -0.0061(8)   | -0.0005(7)  | -0.0117(8)   |
| C12  | 0.0294(9)  | 0.0454(10) | 0.0267(9)  | 0.0021(8)    | -0.0051(7)  | -0.0002(7)   |
| C13  | 0.0291(8)  | 0.0359(9)  | 0.0224(8)  | 0.0062(7)    | 0.0015(6)   | -0.0063(7)   |
| C14  | 0.0466(11) | 0.0395(10) | 0.0414(10) | 0.0178(9)    | 0.0025(9)   | 0.0061(8)    |
| C15  | 0.0555(12) | 0.0558(12) | 0.0230(9)  | 0.0101(8)    | -0.0030(8)  | -0.0214(10)  |

The form of the anisotropic displacement parameter is:

$$\exp[-2\pi^2(h^2a^*{}^2U_{11} + k^2b^*{}^2U_{22} + l^2c^*{}^2U_{33} + 2klb^*c^*U_{23} + 2hla^*c^*U_{13} + 2hka^*b^*U_{12})]$$

**Table 8a.** Derived Atomic Coordinates and Displacement Parameters for Hydrogen Atoms for **2**.

| Atom | <i>x</i> | <i>y</i> | <i>z</i> | $U_{\text{eq}}$ , Å <sup>2</sup> |
|------|----------|----------|----------|----------------------------------|
| H1   | 0.1089   | 0.4190   | 0.0377   | 0.026                            |
| H3   | 0.2797   | 0.2166   | 0.1130   | 0.033                            |
| H4   | 0.3076   | 0.3617   | 0.2439   | 0.040                            |
| H5   | 0.2631   | 0.5307   | 0.3130   | 0.045                            |
| H6   | 0.1511   | 0.6336   | 0.2785   | 0.043                            |
| H7   | 0.0776   | 0.5656   | 0.1751   | 0.035                            |
| H8A  | 0.2352   | 0.0462   | 0.0423   | 0.040                            |
| H8B  | 0.2842   | 0.1316   | -0.0136  | 0.040                            |
| H8C  | 0.2228   | 0.0354   | -0.0466  | 0.040                            |
| H9A  | 0.1251   | 0.3120   | -0.0701  | 0.047                            |
| H9B  | 0.1434   | 0.1833   | -0.1106  | 0.047                            |
| H9C  | 0.2120   | 0.2779   | -0.0928  | 0.047                            |
| H10  | 0.0295   | 0.1493   | 0.0036   | 0.031                            |
| H11A | -0.1042  | 0.0838   | -0.0028  | 0.043                            |
| H11B | -0.1223  | 0.1708   | 0.0677   | 0.043                            |
| H11C | -0.0655  | 0.0552   | 0.0770   | 0.043                            |
| H12A | -0.0486  | 0.2434   | -0.0866  | 0.041                            |
| H12B | 0.0049   | 0.3488   | -0.0512  | 0.041                            |
| H12C | -0.0834  | 0.3369   | -0.0258  | 0.041                            |
| H13  | -0.0218  | 0.1420   | 0.1892   | 0.035                            |
| H14A | 0.0725   | -0.0036  | 0.1971   | 0.051                            |
| H14B | 0.1335   | 0.0825   | 0.1544   | 0.051                            |
| H14C | 0.0609   | 0.0277   | 0.1099   | 0.051                            |
| H15A | 0.0512   | 0.1672   | 0.2943   | 0.054                            |
| H15B | 0.0273   | 0.3020   | 0.2658   | 0.054                            |
| H15C | 0.1127   | 0.2514   | 0.2509   | 0.054                            |

**Table 1b.** Crystallographic Experimental Details for **4**.*A. Crystal Data*

|                                          |                                             |
|------------------------------------------|---------------------------------------------|
| formula                                  | C <sub>25</sub> H <sub>37</sub> NPRhS       |
| formula weight                           | 517.50                                      |
| crystal dimensions (mm)                  | 0.64 x 0.20 x 0.08                          |
| crystal system                           | monoclinic                                  |
| space group                              | <i>P</i> 2 <sub>1</sub> / <i>c</i> (No. 14) |
| unit cell parameters <sup>a</sup>        |                                             |
| <i>a</i> (Å)                             | 10.1379 (7)                                 |
| <i>b</i> (Å)                             | 12.4282 (8)                                 |
| <i>c</i> (Å)                             | 18.8478 (13)                                |
| β (deg)                                  | 93.7628 (11)                                |
| <i>V</i> (Å <sup>3</sup> )               | 2369.6 (3)                                  |
| <i>Z</i>                                 | 4                                           |
| ρ <sub>calcd</sub> (g cm <sup>-3</sup> ) | 1.451                                       |
| μ (mm <sup>-1</sup> )                    | 0.888                                       |

*B. Data Collection and Refinement Conditions*

|                                                                                                          |                                                                                                  |
|----------------------------------------------------------------------------------------------------------|--------------------------------------------------------------------------------------------------|
| diffractometer                                                                                           | Bruker PLATFORM/SMART 1000 CCD <sup>b</sup>                                                      |
| radiation (λ [Å])                                                                                        | graphite-monochromated Mo Kα (0.71073)                                                           |
| temperature (°C)                                                                                         | -80                                                                                              |
| scan type                                                                                                | ω scans (0.3°) (20 s exposures)                                                                  |
| data collection 2θ limit (deg)                                                                           | 52.74                                                                                            |
| total data collected                                                                                     | 15830 (-12 ≤ <i>h</i> ≤ 11, -15 ≤ <i>k</i> ≤ 15, -23 ≤ <i>l</i> ≤ 23)                            |
| independent reflections                                                                                  | 4830 ( <i>R</i> <sub>int</sub> = 0.0314)                                                         |
| number of observed reflections ( <i>NO</i> )                                                             | 4087 [ <i>F</i> <sub>o</sub> <sup>2</sup> ≥ 2σ( <i>F</i> <sub>o</sub> <sup>2</sup> )]            |
| structure solution method                                                                                | Patterson search/structure expansion ( <i>DIRDIF-99</i> <sup>c</sup> )                           |
| refinement method                                                                                        | full-matrix least-squares on <i>F</i> <sup>2</sup> ( <i>SHELXL-93</i> <sup>d</sup> )             |
| absorption correction method                                                                             | multi-scan ( <i>SADABS</i> )                                                                     |
| range of transmission factors                                                                            | 0.9323–0.6002                                                                                    |
| data/restraints/parameters                                                                               | 4830 [ <i>F</i> <sub>o</sub> <sup>2</sup> ≥ -3σ( <i>F</i> <sub>o</sub> <sup>2</sup> )] / 0 / 262 |
| goodness-of-fit ( <i>S</i> ) <sup>e</sup>                                                                | 1.020 [ <i>F</i> <sub>o</sub> <sup>2</sup> ≥ -3σ( <i>F</i> <sub>o</sub> <sup>2</sup> )]          |
| final <i>R</i> indices <sup>f</sup>                                                                      |                                                                                                  |
| <i>R</i> <sub>1</sub> [ <i>F</i> <sub>o</sub> <sup>2</sup> ≥ 2σ( <i>F</i> <sub>o</sub> <sup>2</sup> )]   | 0.0281                                                                                           |
| <i>wR</i> <sub>2</sub> [ <i>F</i> <sub>o</sub> <sup>2</sup> ≥ -3σ( <i>F</i> <sub>o</sub> <sup>2</sup> )] | 0.0770                                                                                           |
| largest difference peak and hole                                                                         | 0.734 and -0.274 e Å <sup>-3</sup>                                                               |

<sup>a</sup>Obtained from least-squares refinement of 5212 reflections with 5.20° < 2θ < 52.74°.

<sup>b</sup>Programs for diffractometer operation, data collection, data reduction and absorption correction were those supplied by Bruker.

(continued)

**Table 1b.** Crystallographic Experimental Details for **4.** (continued)

<sup>c</sup>Beurskens, P. T.; Beurskens, G.; de Gelder, R.; Garcia-Granda, S.; Israel, R.; Gould, R. O.; Smits, J. M. M. (1999). The *DIRDIF-99* program system. Crystallography Laboratory, University of Nijmegen, The Netherlands.

<sup>d</sup>Sheldrick, G. M. *SHELXL-93*. Program for crystal structure determination. University of Göttingen, Germany, 1993. Refinement on  $F_o^2$  for all reflections (all of these having  $F_o^2 \geq -3\sigma(F_o^2)$ ). Weighted  $R$ -factors  $wR_2$  and all goodnesses of fit  $S$  are based on  $F_o^2$ ; conventional  $R$ -factors  $R_1$  are based on  $F_o$ , with  $F_o$  set to zero for negative  $F_o^2$ . The observed criterion of  $F_o^2 > 2\sigma(F_o^2)$  is used only for calculating  $R_1$ , and is not relevant to the choice of reflections for refinement.  $R$ -factors based on  $F_o^2$  are statistically about twice as large as those based on  $F_o$ , and  $R$ -factors based on ALL data will be even larger.

<sup>e</sup> $S = [\Sigma w(F_o^2 - F_c^2)^2 / (n - p)]^{1/2}$  ( $n$  = number of data;  $p$  = number of parameters varied;  $w = [\sigma^2(F_o^2) + (0.0406P)^2 + 1.2457P]^{-1}$  where  $P = [\text{Max}(F_o^2, 0) + 2F_c^2]/3$ ).

<sup>f</sup> $R_1 = \Sigma ||F_o| - |F_c|| / \Sigma |F_o|$ ;  $wR_2 = [\Sigma w(F_o^2 - F_c^2)^2 / \Sigma w(F_o^4)]^{1/2}$ .

**Table 2b.** Atomic Coordinates and Equivalent Isotropic Displacement Parameters for **4**.

| Atom | <i>x</i>     | <i>y</i>      | <i>z</i>    | <i>U</i> <sub>eq</sub> , Å <sup>2</sup> |
|------|--------------|---------------|-------------|-----------------------------------------|
| Rh   | 0.226552(17) | -0.003238(13) | 0.215617(9) | 0.02248(7)*                             |
| S    | 0.09809(6)   | -0.11269(6)   | 0.28852(3)  | 0.03435(16)*                            |
| P    | 0.25200(6)   | -0.08424(5)   | 0.35896(3)  | 0.02176(13)*                            |
| N    | 0.2118(2)    | 0.17774(17)   | 0.37100(11) | 0.0349(5)*                              |
| C1   | 0.3412(2)    | 0.02132(18)   | 0.31956(12) | 0.0234(5)*                              |
| C2   | 0.3289(2)    | 0.13444(19)   | 0.34671(12) | 0.0274(5)*                              |
| C3   | 0.4491(3)    | 0.1841(2)     | 0.35001(13) | 0.0338(6)*                              |
| C3A  | 0.5471(2)    | 0.1114(2)     | 0.32673(13) | 0.0313(5)*                              |
| C4   | 0.6827(3)    | 0.1259(3)     | 0.31788(15) | 0.0428(7)*                              |
| C5   | 0.7554(3)    | 0.0427(3)     | 0.29348(16) | 0.0485(8)*                              |
| C6   | 0.6962(3)    | -0.0542(3)    | 0.27513(16) | 0.0427(7)*                              |
| C7   | 0.5614(3)    | -0.0697(2)    | 0.28122(14) | 0.0344(6)*                              |
| C7A  | 0.4866(2)    | 0.01174(18)   | 0.30924(13) | 0.0262(5)*                              |
| C11  | 0.2953(3)    | 0.1388(2)     | 0.16838(13) | 0.0319(5)*                              |
| C12  | 0.3723(3)    | 0.0529(2)     | 0.14751(13) | 0.0341(6)*                              |
| C13  | 0.3606(3)    | 0.0016(2)     | 0.07429(16) | 0.0466(7)*                              |
| C14  | 0.2611(4)    | -0.0904(3)    | 0.06878(15) | 0.0534(8)*                              |
| C15  | 0.1539(3)    | -0.0822(2)    | 0.12031(13) | 0.0372(6)*                              |
| C16  | 0.0772(3)    | 0.0087(2)     | 0.12930(15) | 0.0374(6)*                              |
| C17  | 0.0910(3)    | 0.1101(2)     | 0.08596(16) | 0.0460(7)*                              |
| C18  | 0.1848(3)    | 0.1911(2)     | 0.12292(14) | 0.0409(6)*                              |
| C21  | 0.1903(3)    | -0.0435(2)    | 0.44514(13) | 0.0314(5)*                              |
| C22  | 0.2964(3)    | 0.0013(2)     | 0.49817(14) | 0.0432(7)*                              |
| C23  | 0.1056(3)    | -0.1288(2)    | 0.47806(16) | 0.0466(7)*                              |
| C24  | 0.3506(3)    | -0.20822(19)  | 0.36877(13) | 0.0306(5)*                              |
| C25  | 0.4607(3)    | -0.2031(2)    | 0.42805(15) | 0.0418(7)*                              |
| C26  | 0.2675(3)    | -0.3094(2)    | 0.37451(15) | 0.0412(6)*                              |
| C27  | 0.0953(3)    | 0.1839(2)     | 0.32269(15) | 0.0391(6)*                              |
| C28  | 0.2277(3)    | 0.2760(3)     | 0.41268(17) | 0.0543(9)*                              |

Anisotropically-refined atoms are marked with an asterisk (\*). The form of the anisotropic displacement parameter is:  $\exp[-2\pi^2(h^2a^{*2}U_{11} + k^2b^{*2}U_{22} + l^2c^{*2}U_{33} + 2klb^{*c^*}U_{23} + 2hla^{*c^*}U_{13} + 2hka^{*b^*}U_{12})]$ .

**Table 3b.** Selected Interatomic Distances (Å) for **4**.

| Atom1 | Atom2 | Distance  | Atom1 | Atom2 | Distance |
|-------|-------|-----------|-------|-------|----------|
| Rh    | S     | 2.3811(7) | C3A   | C7A   | 1.411(3) |
| Rh    | C1    | 2.233(2)  | C4    | C5    | 1.366(5) |
| Rh    | C11   | 2.116(2)  | C5    | C6    | 1.379(5) |
| Rh    | C12   | 2.137(3)  | C6    | C7    | 1.392(4) |
| Rh    | C15   | 2.135(2)  | C7    | C7A   | 1.390(4) |
| Rh    | C16   | 2.153(3)  | C11   | C12   | 1.394(4) |
| S     | P     | 2.0127(8) | C11   | C18   | 1.512(4) |
| P     | C1    | 1.783(2)  | C12   | C13   | 1.518(4) |
| P     | C21   | 1.849(2)  | C13   | C14   | 1.524(5) |
| P     | C24   | 1.840(2)  | C14   | C15   | 1.508(4) |
| N     | C2    | 1.407(3)  | C15   | C16   | 1.388(4) |
| N     | C27   | 1.445(3)  | C16   | C17   | 1.513(4) |
| N     | C28   | 1.455(3)  | C17   | C18   | 1.522(4) |
| C1    | C2    | 1.504(3)  | C21   | C22   | 1.525(4) |
| C1    | C7A   | 1.504(3)  | C21   | C23   | 1.522(4) |
| C2    | C3    | 1.364(4)  | C24   | C25   | 1.528(4) |
| C3    | C3A   | 1.434(4)  | C24   | C26   | 1.522(4) |
| C3A   | C4    | 1.407(4)  |       |       |          |



**Table 4b.** Selected Interatomic Angles (deg) for 4.

| Atom1 | Atom2 | Atom3 | Angle      | Atom1 | Atom2 | Atom3 | Angle      |
|-------|-------|-------|------------|-------|-------|-------|------------|
| S     | Rh    | C1    | 81.07(6)   | C2    | C3    | C3A   | 109.7(2)   |
| S     | Rh    | C11   | 158.03(8)  | C3    | C3A   | C4    | 131.1(2)   |
| S     | Rh    | C12   | 163.56(8)  | C3    | C3A   | C7A   | 109.0(2)   |
| S     | Rh    | C15   | 92.96(8)   | C4    | C3A   | C7A   | 119.9(3)   |
| S     | Rh    | C16   | 95.23(8)   | C3A   | C4    | C5    | 119.7(3)   |
| C1    | Rh    | C11   | 95.06(9)   | C4    | C5    | C6    | 120.7(3)   |
| C1    | Rh    | C12   | 98.14(9)   | C5    | C6    | C7    | 120.9(3)   |
| C1    | Rh    | C15   | 158.78(10) | C6    | C7    | C7A   | 119.6(3)   |
| C1    | Rh    | C16   | 162.44(10) | C1    | C7A   | C3A   | 108.4(2)   |
| C11   | Rh    | C12   | 38.26(10)  | C1    | C7A   | C7    | 132.1(2)   |
| C11   | Rh    | C15   | 97.72(10)  | C3A   | C7A   | C7    | 119.2(2)   |
| C11   | Rh    | C16   | 81.92(10)  | Rh    | C11   | C12   | 71.71(15)  |
| C12   | Rh    | C15   | 81.87(11)  | Rh    | C11   | C18   | 110.17(17) |
| C12   | Rh    | C16   | 90.19(10)  | C12   | C11   | C18   | 125.2(2)   |
| C15   | Rh    | C16   | 37.76(11)  | Rh    | C12   | C11   | 70.03(14)  |
| Rh    | S     | P     | 81.41(3)   | Rh    | C12   | C13   | 113.13(19) |
| S     | P     | C1    | 104.30(8)  | C11   | C12   | C13   | 124.5(2)   |
| S     | P     | C21   | 109.58(9)  | C12   | C13   | C14   | 112.9(2)   |
| S     | P     | C24   | 108.17(9)  | C13   | C14   | C15   | 114.0(2)   |
| C1    | P     | C21   | 111.99(11) | Rh    | C15   | C14   | 110.49(19) |
| C1    | P     | C24   | 111.77(11) | Rh    | C15   | C16   | 71.85(15)  |
| C21   | P     | C24   | 110.75(11) | C14   | C15   | C16   | 124.6(3)   |
| C2    | N     | C27   | 119.2(2)   | Rh    | C16   | C15   | 70.39(14)  |
| C2    | N     | C28   | 115.5(2)   | Rh    | C16   | C17   | 112.32(18) |
| C27   | N     | C28   | 110.7(2)   | C15   | C16   | C17   | 122.6(3)   |
| Rh    | C1    | P     | 90.90(10)  | C16   | C17   | C18   | 112.4(2)   |
| Rh    | C1    | C2    | 112.09(15) | C11   | C18   | C17   | 113.1(2)   |
| Rh    | C1    | C7A   | 109.51(15) | P     | C21   | C22   | 114.26(19) |
| P     | C1    | C2    | 119.35(17) | P     | C21   | C23   | 113.56(19) |
| P     | C1    | C7A   | 121.59(16) | C22   | C21   | C23   | 112.3(2)   |
| C2    | C1    | C7A   | 102.85(19) | P     | C24   | C25   | 113.88(18) |
| N     | C2    | C1    | 124.0(2)   | P     | C24   | C26   | 113.54(18) |
| N     | C2    | C3    | 125.6(2)   | C25   | C24   | C26   | 111.3(2)   |
| C1    | C2    | C3    | 110.1(2)   |       |       |       |            |

**Table 5b.** Torsional Angles (deg) for **4**.

| Atom1 | Atom2 | Atom3 | Atom4 | Angle       | Atom1 | Atom2 | Atom3 | Atom4 | Angle       |
|-------|-------|-------|-------|-------------|-------|-------|-------|-------|-------------|
| C1    | Rh    | S     | P     | -9.75(6)    | C1    | Rh    | C15   | C14   | -71.5(3)    |
| C11   | Rh    | S     | P     | -91.07(18)  | C1    | Rh    | C15   | C16   | 167.5(2)    |
| C12   | Rh    | S     | P     | 78.7(3)     | C11   | Rh    | C15   | C14   | 55.0(2)     |
| C15   | Rh    | S     | P     | 149.77(8)   | C11   | Rh    | C15   | C16   | -66.02(18)  |
| C16   | Rh    | S     | P     | -172.44(8)  | C12   | Rh    | C15   | C14   | 20.0(2)     |
| S     | Rh    | C1    | P     | 10.89(7)    | C12   | Rh    | C15   | C16   | -100.96(17) |
| S     | Rh    | C1    | C2    | -111.47(17) | C16   | Rh    | C15   | C14   | 121.0(3)    |
| S     | Rh    | C1    | C7A   | 135.05(15)  | S     | Rh    | C16   | C15   | -88.07(16)  |
| C11   | Rh    | C1    | P     | 169.10(10)  | S     | Rh    | C16   | C17   | 153.7(2)    |
| C11   | Rh    | C1    | C2    | 46.73(18)   | C1    | Rh    | C16   | C15   | -164.9(3)   |
| C11   | Rh    | C1    | C7A   | -66.75(16)  | C1    | Rh    | C16   | C17   | 76.8(4)     |
| C12   | Rh    | C1    | P     | -152.50(10) | C11   | Rh    | C16   | C15   | 113.87(18)  |
| C12   | Rh    | C1    | C2    | 85.14(18)   | C11   | Rh    | C16   | C17   | -4.3(2)     |
| C12   | Rh    | C1    | C7A   | -28.34(17)  | C12   | Rh    | C16   | C15   | 76.39(17)   |
| C15   | Rh    | C1    | P     | -64.0(3)    | C12   | Rh    | C16   | C17   | -41.8(2)    |
| C15   | Rh    | C1    | C2    | 173.6(2)    | C15   | Rh    | C16   | C17   | -118.2(3)   |
| C15   | Rh    | C1    | C7A   | 60.1(3)     | Rh    | S     | P     | C1    | 12.48(8)    |
| C16   | Rh    | C1    | P     | 89.9(3)     | Rh    | S     | P     | C21   | 132.54(9)   |
| C16   | Rh    | C1    | C2    | -32.4(4)    | Rh    | S     | P     | C24   | -106.63(9)  |
| C16   | Rh    | C1    | C7A   | -145.9(3)   | S     | P     | C1    | Rh    | -13.18(8)   |
| S     | Rh    | C11   | C12   | 175.37(14)  | S     | P     | C1    | C2    | 102.94(18)  |
| S     | Rh    | C11   | C18   | -62.9(3)    | S     | P     | C1    | C7A   | -126.87(18) |
| C1    | Rh    | C11   | C12   | 96.73(15)   | C21   | P     | C1    | Rh    | -131.60(10) |
| C1    | Rh    | C11   | C18   | -141.53(18) | C21   | P     | C1    | C2    | -15.5(2)    |
| C12   | Rh    | C11   | C18   | 121.7(2)    | C21   | P     | C1    | C7A   | 114.7(2)    |
| C15   | Rh    | C11   | C12   | -66.28(17)  | C24   | P     | C1    | Rh    | 103.46(10)  |
| C15   | Rh    | C11   | C18   | 55.5(2)     | C24   | P     | C1    | C2    | -140.42(18) |
| C16   | Rh    | C11   | C12   | -100.69(16) | C24   | P     | C1    | C7A   | -10.2(2)    |
| C16   | Rh    | C11   | C18   | 21.05(19)   | S     | P     | C21   | C22   | -168.59(17) |
| S     | Rh    | C12   | C11   | -173.87(19) | S     | P     | C21   | C23   | 60.8(2)     |
| S     | Rh    | C12   | C13   | 66.1(3)     | C1    | P     | C21   | C22   | -53.3(2)    |
| C1    | Rh    | C12   | C11   | -87.85(15)  | C1    | P     | C21   | C23   | 176.1(2)    |
| C1    | Rh    | C12   | C13   | 152.2(2)    | C24   | P     | C21   | C22   | 72.2(2)     |
| C11   | Rh    | C12   | C13   | -120.0(3)   | C24   | P     | C21   | C23   | -58.4(2)    |
| C15   | Rh    | C12   | C11   | 113.59(16)  | S     | P     | C24   | C25   | -172.29(17) |
| C15   | Rh    | C12   | C13   | -6.4(2)     | S     | P     | C24   | C26   | -43.5(2)    |
| C16   | Rh    | C12   | C11   | 76.63(16)   | C1    | P     | C24   | C25   | 73.4(2)     |
| C16   | Rh    | C12   | C13   | -43.4(2)    | C1    | P     | C24   | C26   | -157.76(18) |
| S     | Rh    | C15   | C14   | -144.3(2)   | C21   | P     | C24   | C25   | -52.2(2)    |
| S     | Rh    | C15   | C16   | 94.73(16)   | C21   | P     | C24   | C26   | 76.6(2)     |

**Table 5b.** Torsional Angles for **4**. (continued)

| Atom1 | Atom2 | Atom3 | Atom4 | Angle       | Atom1 | Atom2 | Atom3 | Atom4 | Angle     |
|-------|-------|-------|-------|-------------|-------|-------|-------|-------|-----------|
| C27   | N     | C2    | C1    | -60.7(3)    | C4    | C3A   | C7A   | C1    | -176.5(2) |
| C27   | N     | C2    | C3    | 125.5(3)    | C4    | C3A   | C7A   | C7    | -2.1(4)   |
| C28   | N     | C2    | C1    | 163.8(2)    | C3A   | C4    | C5    | C6    | 2.2(4)    |
| C28   | N     | C2    | C3    | -10.1(4)    | C4    | C5    | C6    | C7    | -0.2(5)   |
| Rh    | C1    | C2    | N     | 69.1(3)     | C5    | C6    | C7    | C7A   | -3.0(4)   |
| Rh    | C1    | C2    | C3    | -116.25(19) | C6    | C7    | C7A   | C1    | 177.0(3)  |
| P     | C1    | C2    | N     | -35.3(3)    | C6    | C7    | C7A   | C3A   | 4.1(4)    |
| P     | C1    | C2    | C3    | 139.41(19)  | Rh    | C11   | C12   | C13   | 104.9(3)  |
| C7A   | C1    | C2    | N     | -173.4(2)   | C18   | C11   | C12   | Rh    | -102.2(2) |
| C7A   | C1    | C2    | C3    | 1.3(3)      | C18   | C11   | C12   | C13   | 2.7(4)    |
| Rh    | C1    | C7A   | C3A   | 117.50(18)  | Rh    | C11   | C18   | C17   | -34.9(3)  |
| Rh    | C1    | C7A   | C7    | -56.0(3)    | C12   | C11   | C18   | C17   | 46.5(4)   |
| P     | C1    | C7A   | C3A   | -138.76(18) | Rh    | C12   | C13   | C14   | -8.5(3)   |
| P     | C1    | C7A   | C7    | 47.8(4)     | C11   | C12   | C13   | C14   | -89.5(3)  |
| C2    | C1    | C7A   | C3A   | -1.8(2)     | C12   | C13   | C14   | C15   | 26.1(4)   |
| C2    | C1    | C7A   | C7    | -175.3(3)   | C13   | C14   | C15   | Rh    | -30.8(3)  |
| N     | C2    | C3    | C3A   | 174.3(2)    | C13   | C14   | C15   | C16   | 50.7(4)   |
| C1    | C2    | C3    | C3A   | -0.3(3)     | Rh    | C15   | C16   | C17   | 104.5(2)  |
| C2    | C3    | C3A   | C4    | 177.1(3)    | C14   | C15   | C16   | Rh    | -102.8(3) |
| C2    | C3    | C3A   | C7A   | -1.0(3)     | C14   | C15   | C16   | C17   | 1.7(4)    |
| C3    | C3A   | C4    | C5    | -179.0(3)   | Rh    | C16   | C17   | C18   | -13.3(3)  |
| C7A   | C3A   | C4    | C5    | -1.1(4)     | C15   | C16   | C17   | C18   | -93.7(3)  |
| C3    | C3A   | C7A   | C1    | 1.8(3)      | C16   | C17   | C18   | C11   | 31.8(4)   |
| C3    | C3A   | C7A   | C7    | 176.2(2)    |       |       |       |       |           |

**Table 6b.** Least-Squares Planes for **4**.

| Plane | Coefficients <sup>a</sup> |            |           | Defining Atoms with Deviations (Å) <sup>b</sup> |             |
|-------|---------------------------|------------|-----------|-------------------------------------------------|-------------|
| 1     | 1.330(6)                  | -4.080(10) | 17.431(5) | 5.948(4)                                        |             |
|       |                           |            |           | C1                                              | -0.0108(18) |
|       |                           |            |           | C2                                              | -0.0157(18) |
|       |                           |            |           | C3                                              | -0.0008(19) |
|       |                           |            |           | C3A                                             | 0.021(2)    |
|       |                           |            |           | C4                                              | -0.013(2)   |
|       |                           |            |           | C5                                              | -0.002(2)   |
|       |                           |            |           | C6                                              | -0.005(2)   |
|       |                           |            |           | C7                                              | -0.015(2)   |
|       |                           |            |           | C7A                                             | 0.042(2)    |
|       |                           |            |           | <u>Rh</u>                                       | -1.875(2)   |
|       |                           |            |           | <u>P</u>                                        | 0.988(3)    |
|       |                           |            |           | <u>N</u>                                        | 0.075(3)    |

<sup>a</sup>Coefficients are for the form  $ax+by+cz = d$  where  $x$ ,  $y$  and  $z$  are crystallographic coordinates.

<sup>b</sup>Underlined atoms were not included in the definition of the plane.

**Table 7b.** Anisotropic Displacement Parameters ( $U_{ij}$ , Å<sup>2</sup>) for **4**.

| Atom | $U_{11}$    | $U_{22}$    | $U_{33}$    | $U_{23}$    | $U_{13}$    | $U_{12}$    |
|------|-------------|-------------|-------------|-------------|-------------|-------------|
| Rh   | 0.02220(11) | 0.02516(11) | 0.02009(11) | -0.00030(7) | 0.00159(7)  | -0.00246(7) |
| S    | 0.0280(3)   | 0.0438(4)   | 0.0306(3)   | 0.0072(3)   | -0.0031(3)  | -0.0139(3)  |
| P    | 0.0190(3)   | 0.0247(3)   | 0.0218(3)   | -0.0012(2)  | 0.0027(2)   | -0.0014(2)  |
| N    | 0.0428(13)  | 0.0321(11)  | 0.0299(11)  | -0.0058(9)  | 0.0022(10)  | 0.0101(10)  |
| C1   | 0.0207(11)  | 0.0250(11)  | 0.0245(11)  | -0.0026(9)  | 0.0013(9)   | 0.0010(9)   |
| C2   | 0.0323(13)  | 0.0285(12)  | 0.0212(11)  | 0.0001(9)   | 0.0008(10)  | 0.0015(10)  |
| C3   | 0.0438(16)  | 0.0294(12)  | 0.0276(12)  | -0.0047(10) | -0.0019(11) | -0.0089(11) |
| C3A  | 0.0280(13)  | 0.0382(13)  | 0.0270(12)  | 0.0028(10)  | -0.0033(10) | -0.0073(10) |
| C4   | 0.0310(15)  | 0.0548(17)  | 0.0420(16)  | 0.0008(13)  | -0.0020(12) | -0.0178(13) |
| C5   | 0.0234(14)  | 0.072(2)    | 0.0503(18)  | 0.0104(16)  | 0.0041(13)  | -0.0053(14) |
| C6   | 0.0286(14)  | 0.0518(17)  | 0.0490(16)  | 0.0138(13)  | 0.0129(12)  | 0.0101(12)  |
| C7   | 0.0272(13)  | 0.0347(13)  | 0.0421(14)  | 0.0070(11)  | 0.0090(11)  | 0.0029(10)  |
| C7A  | 0.0216(12)  | 0.0326(12)  | 0.0244(11)  | 0.0046(9)   | 0.0003(9)   | -0.0027(9)  |
| C11  | 0.0398(15)  | 0.0313(12)  | 0.0248(12)  | 0.0032(10)  | 0.0040(11)  | -0.0102(11) |
| C12  | 0.0285(14)  | 0.0475(15)  | 0.0269(12)  | 0.0049(11)  | 0.0064(10)  | -0.0043(11) |
| C13  | 0.0527(19)  | 0.0581(19)  | 0.0306(14)  | -0.0002(12) | 0.0161(13)  | 0.0083(14)  |
| C14  | 0.079(2)    | 0.0504(18)  | 0.0312(15)  | -0.0108(13) | 0.0081(15)  | 0.0040(17)  |
| C15  | 0.0478(17)  | 0.0361(14)  | 0.0267(12)  | -0.0042(11) | -0.0052(11) | -0.0103(12) |
| C16  | 0.0305(14)  | 0.0484(16)  | 0.0319(13)  | 0.0069(11)  | -0.0080(11) | -0.0092(12) |
| C17  | 0.0427(17)  | 0.0483(16)  | 0.0459(16)  | 0.0152(13)  | -0.0064(13) | 0.0032(13)  |
| C18  | 0.0528(18)  | 0.0353(14)  | 0.0348(14)  | 0.0066(11)  | 0.0050(13)  | 0.0025(13)  |
| C21  | 0.0348(14)  | 0.0342(12)  | 0.0261(12)  | 0.0000(10)  | 0.0098(11)  | 0.0028(11)  |
| C22  | 0.0549(19)  | 0.0510(17)  | 0.0238(13)  | -0.0067(11) | 0.0039(12)  | -0.0009(14) |
| C23  | 0.0571(19)  | 0.0427(16)  | 0.0432(16)  | 0.0010(13)  | 0.0278(14)  | -0.0028(14) |
| C24  | 0.0350(14)  | 0.0303(12)  | 0.0276(12)  | 0.0018(10)  | 0.0092(10)  | 0.0032(10)  |
| C25  | 0.0372(16)  | 0.0457(16)  | 0.0421(15)  | 0.0062(13)  | -0.0008(12) | 0.0107(12)  |
| C26  | 0.0511(18)  | 0.0310(13)  | 0.0431(15)  | 0.0046(11)  | 0.0149(13)  | 0.0010(12)  |
| C27  | 0.0312(14)  | 0.0411(15)  | 0.0457(16)  | -0.0078(12) | 0.0068(12)  | 0.0067(11)  |
| C28  | 0.062(2)    | 0.0528(18)  | 0.0475(17)  | -0.0230(15) | -0.0029(15) | 0.0177(16)  |

The form of the anisotropic displacement parameter is:

$$\exp[-2\pi^2(h^2a^*{}^2U_{11} + k^2b^*{}^2U_{22} + l^2c^*{}^2U_{33} + 2klb^*c^*U_{23} + 2hla^*c^*U_{13} + 2hka^*b^*U_{12})]$$

**Table 8b.** Derived Atomic Coordinates and Displacement Parameters for Hydrogen Atoms for 4.

| Atom | <i>x</i> | <i>y</i> | <i>z</i> | $U_{\text{eq}}, \text{\AA}^2$ |
|------|----------|----------|----------|-------------------------------|
| H3   | 0.4653   | 0.2560   | 0.3654   | 0.041                         |
| H4   | 0.7236   | 0.1932   | 0.3288   | 0.051                         |
| H5   | 0.8475   | 0.0518   | 0.2891   | 0.058                         |
| H6   | 0.7482   | -0.1111  | 0.2581   | 0.051                         |
| H7   | 0.5209   | -0.1356  | 0.2663   | 0.041                         |
| H11  | 0.3428   | 0.1890   | 0.2027   | 0.038                         |
| H12  | 0.4643   | 0.0528   | 0.1702   | 0.041                         |
| H13A | 0.4483   | -0.0259  | 0.0628   | 0.056                         |
| H13B | 0.3336   | 0.0572   | 0.0386   | 0.056                         |
| H14A | 0.2195   | -0.0924  | 0.0198   | 0.064                         |
| H14B | 0.3090   | -0.1591  | 0.0772   | 0.064                         |
| H15  | 0.1073   | -0.1515  | 0.1284   | 0.045                         |
| H16  | -0.0147  | -0.0066  | 0.1428   | 0.045                         |
| H17A | 0.0029   | 0.1437   | 0.0772   | 0.055                         |
| H17B | 0.1240   | 0.0909   | 0.0393   | 0.055                         |
| H18A | 0.2236   | 0.2365   | 0.0865   | 0.049                         |
| H18B | 0.1339   | 0.2387   | 0.1532   | 0.049                         |
| H21  | 0.1291   | 0.0181   | 0.4338   | 0.038                         |
| H22A | 0.3485   | 0.0555   | 0.4747   | 0.052                         |
| H22B | 0.3545   | -0.0573  | 0.5157   | 0.052                         |
| H22C | 0.2543   | 0.0343   | 0.5382   | 0.052                         |
| H23A | 0.0369   | -0.1532  | 0.4427   | 0.056                         |
| H23B | 0.0641   | -0.0982  | 0.5190   | 0.056                         |
| H23C | 0.1612   | -0.1900  | 0.4936   | 0.056                         |
| H24  | 0.3962   | -0.2158  | 0.3235   | 0.037                         |
| H25A | 0.5120   | -0.1370  | 0.4232   | 0.050                         |
| H25B | 0.5189   | -0.2656  | 0.4247   | 0.050                         |
| H25C | 0.4218   | -0.2035  | 0.4743   | 0.050                         |
| H26A | 0.1980   | -0.3106  | 0.3358   | 0.049                         |
| H26B | 0.2270   | -0.3099  | 0.4203   | 0.049                         |
| H26C | 0.3239   | -0.3730  | 0.3711   | 0.049                         |
| H27A | 0.0227   | 0.2162   | 0.3472   | 0.047                         |
| H27B | 0.0700   | 0.1114   | 0.3066   | 0.047                         |
| H27C | 0.1142   | 0.2283   | 0.2816   | 0.047                         |
| H28A | 0.1412   | 0.2998   | 0.4271   | 0.065                         |
| H28B | 0.2661   | 0.3322   | 0.3839   | 0.065                         |
| H28C | 0.2864   | 0.2622   | 0.4551   | 0.065                         |

**Table 1c.** Crystallographic Experimental Details for **5**.*A. Crystal Data*

|                                          |                                                      |
|------------------------------------------|------------------------------------------------------|
| formula                                  | C <sub>20</sub> H <sub>25</sub> MnNO <sub>3</sub> PS |
| formula weight                           | 445.38                                               |
| crystal dimensions (mm)                  | 0.46 × 0.39 × 0.32                                   |
| crystal system                           | monoclinic                                           |
| space group                              | P2 <sub>1</sub> /c (No. 14)                          |
| unit cell parameters <sup>a</sup>        |                                                      |
| <i>a</i> (Å)                             | 9.688 (2)                                            |
| <i>b</i> (Å)                             | 15.570 (4)                                           |
| <i>c</i> (Å)                             | 13.898 (3)                                           |
| β (deg)                                  | 91.494 (4)                                           |
| <i>V</i> (Å <sup>3</sup> )               | 2095.8 (8)                                           |
| <i>Z</i>                                 | 4                                                    |
| ρ <sub>calcd</sub> (g cm <sup>-3</sup> ) | 1.412                                                |
| μ (mm <sup>-1</sup> )                    | 0.825                                                |

*B. Data Collection and Refinement Conditions*

|                                                                                                          |                                                                                                  |
|----------------------------------------------------------------------------------------------------------|--------------------------------------------------------------------------------------------------|
| diffractometer                                                                                           | Bruker PLATFORM/SMART 1000 CCD <sup>b</sup>                                                      |
| radiation (λ [Å])                                                                                        | graphite-monochromated Mo Kα (0.71073)                                                           |
| temperature (°C)                                                                                         | -80                                                                                              |
| scan type                                                                                                | ω scans (0.3°) (15 s exposures)                                                                  |
| data collection 2θ limit (deg)                                                                           | 52.78                                                                                            |
| total data collected                                                                                     | 16327 (-12 ≤ <i>h</i> ≤ 12, -19 ≤ <i>k</i> ≤ 19, -17 ≤ <i>l</i> ≤ 17)                            |
| independent reflections                                                                                  | 4273 ( <i>R</i> <sub>int</sub> = 0.0252)                                                         |
| number of observed reflections ( <i>NO</i> )                                                             | 3966 [ <i>F</i> <sub>o</sub> <sup>2</sup> ≥ 2σ( <i>F</i> <sub>o</sub> <sup>2</sup> )]            |
| structure solution method                                                                                | Patterson search/structure expansion ( <i>DIRDIF-99</i> <sup>c</sup> )                           |
| refinement method                                                                                        | full-matrix least-squares on <i>F</i> <sup>2</sup> ( <i>SHELXL-93</i> <sup>d</sup> )             |
| absorption correction method                                                                             | multi-scan ( <i>SADABS</i> )                                                                     |
| range of transmission factors                                                                            | 0.7781–0.7027                                                                                    |
| data/restraints/parameters                                                                               | 4273 [ <i>F</i> <sub>o</sub> <sup>2</sup> ≥ -3σ( <i>F</i> <sub>o</sub> <sup>2</sup> )] / 0 / 244 |
| goodness-of-fit ( <i>S</i> ) <sup>e</sup>                                                                | 1.043 [ <i>F</i> <sub>o</sub> <sup>2</sup> ≥ -3σ( <i>F</i> <sub>o</sub> <sup>2</sup> )]          |
| final <i>R</i> indices <sup>f</sup>                                                                      |                                                                                                  |
| <i>R</i> <sub>1</sub> [ <i>F</i> <sub>o</sub> <sup>2</sup> ≥ 2σ( <i>F</i> <sub>o</sub> <sup>2</sup> )]   | 0.0273                                                                                           |
| <i>wR</i> <sub>2</sub> [ <i>F</i> <sub>o</sub> <sup>2</sup> ≥ -3σ( <i>F</i> <sub>o</sub> <sup>2</sup> )] | 0.0764                                                                                           |
| largest difference peak and hole                                                                         | 0.364 and -0.252 e Å <sup>-3</sup>                                                               |

<sup>a</sup>Obtained from least-squares refinement of 7660 reflections with 4.96° < 2θ < 52.78°.

<sup>b</sup>Programs for diffractometer operation, data collection, data reduction and absorption correction were those supplied by Bruker. (continued)

**Table 1c.** Crystallographic Experimental Details for **5.** (continued)

<sup>c</sup>Beurskens, P. T.; Beurskens, G.; Bosman, W. P.; de Gelder, R.; Garcia Granda, S.; Gould, R. O.; Israel, R.; Smits, J. M. M. (1996). The *DIRDIF-96* program system. Crystallography Laboratory, University of Nijmegen, The Netherlands.

<sup>d</sup>Sheldrick, G. M. *SHELXL-93*. Program for crystal structure determination. University of Göttingen, Germany, 1993. Refinement on  $F_o^2$  for all reflections (all of these having  $F_o^2 \geq -3\sigma(F_o^2)$ ). Weighted  $R$ -factors  $wR_2$  and all goodnesses of fit  $S$  are based on  $F_o^2$ ; conventional  $R$ -factors  $R_1$  are based on  $F_o$ , with  $F_o$  set to zero for negative  $F_o^2$ . The observed criterion of  $F_o^2 > 2\sigma(F_o^2)$  is used only for calculating  $R_1$ , and is not relevant to the choice of reflections for refinement.  $R$ -factors based on  $F_o^2$  are statistically about twice as large as those based on  $F_o$ , and  $R$ -factors based on ALL data will be even larger.

<sup>e</sup> $S = [\Sigma w(F_o^2 - F_c^2)^2 / (n - p)]^{1/2}$  ( $n$  = number of data;  $p$  = number of parameters varied;  $w = [\sigma^2(F_o^2) + (0.0401P)^2 + 0.9334P]^{-1}$  where  $P = [\text{Max}(F_o^2, 0) + 2F_c^2]/3$ ).

<sup>f</sup> $R_1 = \Sigma ||F_o| - |F_c|| / \Sigma |F_o|$ ;  $wR_2 = [\Sigma w(F_o^2 - F_c^2)^2 / \Sigma w(F_o^4)]^{1/2}$ .



**Table 2c.** Atomic Coordinates and Equivalent Isotropic Displacement Parameters for **5**.

| Atom | <i>x</i>     | <i>y</i>     | <i>z</i>     | <i>U</i> <sub>eq</sub> , Å <sup>2</sup> |
|------|--------------|--------------|--------------|-----------------------------------------|
| Mn   | 0.06815(2)   | 0.099911(14) | 0.306505(16) | 0.02317(8)*                             |
| S    | 0.31575(5)   | -0.07947(3)  | 0.14839(4)   | 0.04335(13)*                            |
| P    | 0.38519(4)   | 0.01383(2)   | 0.23071(3)   | 0.02378(10)*                            |
| O11  | -0.04313(15) | -0.06912(8)  | 0.24892(11)  | 0.0494(3)*                              |
| O12  | 0.13100(15)  | 0.04632(12)  | 0.50537(10)  | 0.0584(4)*                              |
| O13  | -0.20489(14) | 0.16081(12)  | 0.36398(13)  | 0.0639(5)*                              |
| N    | 0.34625(13)  | 0.18218(8)   | 0.39201(9)   | 0.0258(3)*                              |
| C1   | 0.14592(16)  | 0.22685(9)   | 0.28541(12)  | 0.0280(3)*                              |
| C2   | 0.25821(14)  | 0.17224(9)   | 0.30975(10)  | 0.0226(3)*                              |
| C3   | 0.26328(15)  | 0.10292(8)   | 0.23924(10)  | 0.0211(3)*                              |
| C3A  | 0.15826(15)  | 0.12409(9)   | 0.16515(11)  | 0.0237(3)*                              |
| C4   | 0.11889(17)  | 0.08601(10)  | 0.07500(11)  | 0.0298(3)*                              |
| C5   | 0.01190(18)  | 0.12137(12)  | 0.02217(12)  | 0.0358(4)*                              |
| C6   | -0.06117(18) | 0.19420(12)  | 0.05457(14)  | 0.0401(4)*                              |
| C7   | -0.02684(18) | 0.23310(11)  | 0.13917(14)  | 0.0370(4)*                              |
| C7A  | 0.08602(15)  | 0.19900(9)   | 0.19571(12)  | 0.0276(3)*                              |
| C11  | 0.00171(17)  | -0.00439(10) | 0.27097(12)  | 0.0322(3)*                              |
| C12  | 0.10476(17)  | 0.06551(12)  | 0.42715(13)  | 0.0370(4)*                              |
| C13  | -0.09917(17) | 0.13613(12)  | 0.34092(13)  | 0.0378(4)*                              |
| C21  | 0.54608(16)  | 0.06146(11)  | 0.18435(11)  | 0.0315(3)*                              |
| C22  | 0.6378(2)    | -0.00594(15) | 0.13697(15)  | 0.0496(5)*                              |
| C23  | 0.5143(2)    | 0.13472(13)  | 0.11375(13)  | 0.0424(4)*                              |
| C24  | 0.42284(17)  | -0.02219(10) | 0.35535(11)  | 0.0298(3)*                              |
| C25  | 0.3246(2)    | -0.09365(13) | 0.38473(17)  | 0.0501(5)*                              |
| C26  | 0.5715(2)    | -0.05270(14) | 0.37152(14)  | 0.0450(4)*                              |
| C27  | 0.48224(18)  | 0.21501(13)  | 0.36935(14)  | 0.0435(4)*                              |
| C28  | 0.28801(19)  | 0.23584(12)  | 0.46704(13)  | 0.0394(4)*                              |

Anisotropically-refined atoms are marked with an asterisk (\*). The form of the anisotropic displacement parameter is:  $\exp[-2\pi^2(h^2a^{*2}U_{11} + k^2b^{*2}U_{22} + l^2c^{*2}U_{33} + 2klb^{*c^*}U_{23} + 2hla^{*c^*}U_{13} + 2hka^{*b^*}U_{12})]$ .

**Table 3c.** Selected Interatomic Distances (Å) for **5**.

| Atom1 | Atom2 | Distance   | Atom1 | Atom2 | Distance   |
|-------|-------|------------|-------|-------|------------|
| Mn    | C1    | 2.1381(15) | N     | C27   | 1.455(2)   |
| Mn    | C2    | 2.1579(14) | N     | C28   | 1.461(2)   |
| Mn    | C3    | 2.1312(15) | C1    | C2    | 1.415(2)   |
| Mn    | C3A   | 2.2030(15) | C1    | C7A   | 1.429(2)   |
| Mn    | C7A   | 2.1899(15) | C2    | C3    | 1.4595(19) |
| Mn    | C11   | 1.8109(17) | C3    | C3A   | 1.466(2)   |
| Mn    | C12   | 1.7869(18) | C3A   | C4    | 1.429(2)   |
| Mn    | C13   | 1.7930(18) | C3A   | C7A   | 1.431(2)   |
| S     | P     | 1.9575(6)  | C4    | C5    | 1.370(2)   |
| P     | C3    | 1.8277(14) | C5    | C6    | 1.416(3)   |
| P     | C21   | 1.8566(17) | C6    | C7    | 1.356(3)   |
| P     | C24   | 1.8481(16) | C7    | C7A   | 1.432(2)   |
| O11   | C11   | 1.136(2)   | C21   | C22   | 1.534(2)   |
| O12   | C12   | 1.150(2)   | C21   | C23   | 1.531(2)   |
| O13   | C13   | 1.147(2)   | C24   | C25   | 1.527(2)   |
| N     | C2    | 1.4169(19) | C24   | C26   | 1.528(2)   |

**Table 4c.** Selected Interatomic Angles (deg) for **5**.

| Atom1 | Atom2 | Atom3 | Angle      | Atom1 | Atom2 | Atom3 | Angle      |
|-------|-------|-------|------------|-------|-------|-------|------------|
| C1    | Mn    | C2    | 38.45(5)   | C2    | C1    | C7A   | 108.58(13) |
| C1    | Mn    | C3    | 66.41(5)   | Mn    | C2    | N     | 124.70(10) |
| C1    | Mn    | C3A   | 64.56(6)   | Mn    | C2    | C1    | 70.02(8)   |
| C1    | Mn    | C7A   | 38.53(6)   | Mn    | C2    | C3    | 69.12(8)   |
| C1    | Mn    | C11   | 156.30(7)  | N     | C2    | C1    | 124.77(13) |
| C1    | Mn    | C12   | 110.11(7)  | N     | C2    | C3    | 126.33(12) |
| C1    | Mn    | C13   | 94.02(7)   | C1    | C2    | C3    | 108.85(13) |
| C2    | Mn    | C3    | 39.78(5)   | Mn    | C3    | P     | 126.43(7)  |
| C2    | Mn    | C3A   | 64.64(5)   | Mn    | C3    | C2    | 71.09(8)   |
| C2    | Mn    | C7A   | 64.15(6)   | Mn    | C3    | C3A   | 72.89(8)   |
| C2    | Mn    | C11   | 140.43(7)  | P     | C3    | C2    | 129.64(11) |
| C2    | Mn    | C12   | 89.34(6)   | P     | C3    | C3A   | 124.25(11) |
| C2    | Mn    | C13   | 127.38(7)  | C2    | C3    | C3A   | 105.69(12) |
| C3    | Mn    | C3A   | 39.50(5)   | Mn    | C3A   | C3    | 67.61(8)   |
| C3    | Mn    | C7A   | 65.72(5)   | Mn    | C3A   | C4    | 127.45(10) |
| C3    | Mn    | C11   | 102.31(7)  | Mn    | C3A   | C7A   | 70.50(8)   |
| C3    | Mn    | C12   | 105.16(7)  | C3    | C3A   | C4    | 133.40(14) |
| C3    | Mn    | C13   | 158.21(7)  | C3    | C3A   | C7A   | 108.10(13) |
| C3A   | Mn    | C7A   | 38.01(5)   | C4    | C3A   | C7A   | 118.50(14) |
| C3A   | Mn    | C11   | 93.23(7)   | C3A   | C4    | C5    | 118.96(16) |
| C3A   | Mn    | C12   | 144.53(7)  | C4    | C5    | C6    | 121.92(16) |
| C3A   | Mn    | C13   | 124.48(7)  | C5    | C6    | C7    | 121.32(15) |
| C7A   | Mn    | C11   | 118.30(7)  | C6    | C7    | C7A   | 118.47(16) |
| C7A   | Mn    | C12   | 148.61(7)  | Mn    | C7A   | C1    | 68.77(9)   |
| C7A   | Mn    | C13   | 93.13(7)   | Mn    | C7A   | C3A   | 71.49(8)   |
| C11   | Mn    | C12   | 92.72(8)   | Mn    | C7A   | C7    | 125.03(11) |
| C11   | Mn    | C13   | 92.15(8)   | C1    | C7A   | C3A   | 108.41(13) |
| C12   | Mn    | C13   | 90.16(8)   | C1    | C7A   | C7    | 130.80(15) |
| S     | P     | C3    | 112.85(5)  | C3A   | C7A   | C7    | 120.79(15) |
| S     | P     | C21   | 111.86(6)  | Mn    | C11   | O11   | 178.35(16) |
| S     | P     | C24   | 112.28(6)  | Mn    | C12   | O12   | 177.34(17) |
| C3    | P     | C21   | 105.61(7)  | Mn    | C13   | O13   | 178.49(18) |
| C3    | P     | C24   | 106.36(7)  | P     | C21   | C22   | 112.11(14) |
| C21   | P     | C24   | 107.43(8)  | P     | C21   | C23   | 111.30(11) |
| C2    | N     | C27   | 113.14(13) | C22   | C21   | C23   | 110.10(15) |
| C2    | N     | C28   | 113.75(12) | P     | C24   | C25   | 111.26(12) |
| C27   | N     | C28   | 108.80(13) | P     | C24   | C26   | 113.24(12) |
| Mn    | C1    | C2    | 71.53(8)   | C25   | C24   | C26   | 109.03(15) |
| Mn    | C1    | C7A   | 72.70(8)   |       |       |       |            |

**Table 5c.** Torsional Angles (deg) for **5**.

| Atom1 | Atom2 | Atom3 | Atom4 | Angle       | Atom1 | Atom2 | Atom3 | Atom4 | Angle       |
|-------|-------|-------|-------|-------------|-------|-------|-------|-------|-------------|
| C2    | Mn    | C1    | C7A   | 117.12(13)  | C7A   | Mn    | C3    | C3A   | -35.74(8)   |
| C3    | Mn    | C1    | C2    | -37.02(9)   | C11   | Mn    | C3    | P     | -40.34(11)  |
| C3    | Mn    | C1    | C7A   | 80.10(9)    | C11   | Mn    | C3    | C2    | -166.16(9)  |
| C3A   | Mn    | C1    | C2    | -80.57(9)   | C11   | Mn    | C3    | C3A   | 79.98(9)    |
| C3A   | Mn    | C1    | C7A   | 36.55(8)    | C12   | Mn    | C3    | P     | 55.95(11)   |
| C7A   | Mn    | C1    | C2    | -117.12(13) | C12   | Mn    | C3    | C2    | -69.87(10)  |
| C11   | Mn    | C1    | C2    | -102.42(18) | C12   | Mn    | C3    | C3A   | 176.27(9)   |
| C11   | Mn    | C1    | C7A   | 14.7(2)     | C13   | Mn    | C3    | P     | -170.79(15) |
| C12   | Mn    | C1    | C2    | 61.27(11)   | C13   | Mn    | C3    | C2    | 63.4(2)     |
| C12   | Mn    | C1    | C7A   | 178.39(10)  | C13   | Mn    | C3    | C3A   | -50.5(2)    |
| C13   | Mn    | C1    | C2    | 152.91(10)  | C1    | Mn    | C3A   | C3    | 83.12(9)    |
| C13   | Mn    | C1    | C7A   | -89.97(10)  | C1    | Mn    | C3A   | C4    | -148.53(15) |
| C1    | Mn    | C2    | N     | 119.09(15)  | C1    | Mn    | C3A   | C7A   | -37.04(9)   |
| C1    | Mn    | C2    | C3    | -120.43(12) | C2    | Mn    | C3A   | C3    | 40.36(8)    |
| C3    | Mn    | C2    | N     | -120.47(15) | C2    | Mn    | C3A   | C4    | 168.71(15)  |
| C3    | Mn    | C2    | C1    | 120.43(12)  | C2    | Mn    | C3A   | C7A   | -79.80(9)   |
| C3A   | Mn    | C2    | N     | -160.54(13) | C3    | Mn    | C3A   | C4    | 128.35(17)  |
| C3A   | Mn    | C2    | C1    | 80.36(10)   | C3    | Mn    | C3A   | C7A   | -120.16(12) |
| C3A   | Mn    | C2    | C3    | -40.07(8)   | C7A   | Mn    | C3A   | C3    | 120.16(12)  |
| C7A   | Mn    | C2    | N     | 157.13(13)  | C7A   | Mn    | C3A   | C4    | -111.49(17) |
| C7A   | Mn    | C2    | C1    | 38.03(9)    | C11   | Mn    | C3A   | C3    | -105.50(9)  |
| C7A   | Mn    | C2    | C3    | -82.40(9)   | C11   | Mn    | C3A   | C4    | 22.85(14)   |
| C11   | Mn    | C2    | N     | -98.95(14)  | C11   | Mn    | C3A   | C7A   | 134.35(10)  |
| C11   | Mn    | C2    | C1    | 141.96(11)  | C12   | Mn    | C3A   | C3    | -6.22(15)   |
| C11   | Mn    | C2    | C3    | 21.52(13)   | C12   | Mn    | C3A   | C4    | 122.13(16)  |
| C12   | Mn    | C2    | N     | -5.47(13)   | C12   | Mn    | C3A   | C7A   | -126.38(13) |
| C12   | Mn    | C2    | C1    | -124.56(11) | C13   | Mn    | C3A   | C3    | 159.67(9)   |
| C12   | Mn    | C2    | C3    | 115.00(10)  | C13   | Mn    | C3A   | C4    | -71.98(16)  |
| C13   | Mn    | C2    | N     | 84.22(14)   | C13   | Mn    | C3A   | C7A   | 39.51(12)   |
| C13   | Mn    | C2    | C1    | -34.87(13)  | C1    | Mn    | C7A   | C3A   | 119.16(12)  |
| C13   | Mn    | C2    | C3    | -155.31(10) | C1    | Mn    | C7A   | C7    | -125.72(18) |
| C1    | Mn    | C3    | P     | 161.63(11)  | C2    | Mn    | C7A   | C1    | -37.95(9)   |
| C1    | Mn    | C3    | C2    | 35.81(8)    | C2    | Mn    | C7A   | C3A   | 81.20(9)    |
| C1    | Mn    | C3    | C3A   | -78.05(9)   | C2    | Mn    | C7A   | C7    | -163.67(16) |
| C2    | Mn    | C3    | P     | 125.82(13)  | C3    | Mn    | C7A   | C1    | -82.05(9)   |
| C2    | Mn    | C3    | C3A   | -113.86(11) | C3    | Mn    | C7A   | C3A   | 37.11(8)    |
| C3A   | Mn    | C3    | P     | -120.32(13) | C3    | Mn    | C7A   | C7    | 152.24(16)  |
| C3A   | Mn    | C3    | C2    | 113.86(11)  | C3A   | Mn    | C7A   | C1    | -119.16(12) |
| C7A   | Mn    | C3    | P     | -156.06(11) | C3A   | Mn    | C7A   | C7    | 115.13(18)  |
| C7A   | Mn    | C3    | C2    | 78.12(9)    | C11   | Mn    | C7A   | C1    | -173.35(9)  |

**Table 5c.** Torsional Angles for **5**. (continued)

| Atom1 | Atom2 | Atom3 | Atom4 | Angle       | Atom1 | Atom2 | Atom3 | Atom4 | Angle       |
|-------|-------|-------|-------|-------------|-------|-------|-------|-------|-------------|
| C11   | Mn    | C7A   | C3A   | -54.19(11)  | C3    | P     | C21   | C22   | -158.10(12) |
| C11   | Mn    | C7A   | C7    | 60.94(16)   | C3    | P     | C21   | C23   | -34.28(14)  |
| C12   | Mn    | C7A   | C1    | -2.91(17)   | C24   | P     | C21   | C22   | 88.68(13)   |
| C12   | Mn    | C7A   | C3A   | 116.25(15)  | C24   | P     | C21   | C23   | -147.50(12) |
| C12   | Mn    | C7A   | C7    | -128.62(17) | S     | P     | C24   | C25   | -32.28(14)  |
| C13   | Mn    | C7A   | C1    | 92.53(10)   | S     | P     | C24   | C26   | 90.95(13)   |
| C13   | Mn    | C7A   | C3A   | -148.32(10) | C3    | P     | C24   | C25   | 91.61(14)   |
| C13   | Mn    | C7A   | C7    | -33.19(16)  | C3    | P     | C24   | C26   | -145.16(12) |
| C1    | Mn    | C11   | O11   | -96(5)      | C21   | P     | C24   | C25   | -155.67(13) |
| C2    | Mn    | C11   | O11   | -168(5)     | C21   | P     | C24   | C26   | -32.45(14)  |
| C3    | Mn    | C11   | O11   | -154(5)     | C27   | N     | C2    | Mn    | 165.48(11)  |
| C3A   | Mn    | C11   | O11   | -116(5)     | C27   | N     | C2    | C1    | -105.97(17) |
| C7A   | Mn    | C11   | O11   | -85(5)      | C27   | N     | C2    | C3    | 77.14(18)   |
| C12   | Mn    | C11   | O11   | 99(5)       | C28   | N     | C2    | Mn    | -69.70(16)  |
| C13   | Mn    | C11   | O11   | 9(5)        | C28   | N     | C2    | C1    | 18.8(2)     |
| C1    | Mn    | C12   | O12   | -3(4)       | C28   | N     | C2    | C3    | -158.04(14) |
| C2    | Mn    | C12   | O12   | 30(4)       | Mn    | C1    | C2    | N     | -119.01(14) |
| C3    | Mn    | C12   | O12   | 67(4)       | Mn    | C1    | C2    | C3    | 58.35(10)   |
| C3A   | Mn    | C12   | O12   | 71(4)       | C7A   | C1    | C2    | Mn    | -63.70(10)  |
| C7A   | Mn    | C12   | O12   | -1(4)       | C7A   | C1    | C2    | N     | 177.29(13)  |
| C11   | Mn    | C12   | O12   | 171(4)      | C7A   | C1    | C2    | C3    | -5.36(17)   |
| C13   | Mn    | C12   | O12   | -97(4)      | Mn    | C1    | C7A   | C3A   | -60.78(10)  |
| C1    | Mn    | C13   | O13   | -37(8)      | Mn    | C1    | C7A   | C7    | 118.56(18)  |
| C2    | Mn    | C13   | O13   | -16(8)      | C2    | C1    | C7A   | Mn    | 62.95(10)   |
| C3    | Mn    | C13   | O13   | -62(8)      | C2    | C1    | C7A   | C3A   | 2.17(17)    |
| C3A   | Mn    | C13   | O13   | -99(8)      | C2    | C1    | C7A   | C7    | -178.49(16) |
| C7A   | Mn    | C13   | O13   | -76(8)      | Mn    | C2    | C3    | P     | -122.10(12) |
| C11   | Mn    | C13   | O13   | 166(8)      | Mn    | C2    | C3    | C3A   | 65.22(9)    |
| C12   | Mn    | C13   | O13   | 73(8)       | N     | C2    | C3    | Mn    | 118.41(14)  |
| S     | P     | C3    | Mn    | 67.33(10)   | N     | C2    | C3    | P     | -3.7(2)     |
| S     | P     | C3    | C2    | 162.41(11)  | N     | C2    | C3    | C3A   | -176.38(13) |
| S     | P     | C3    | C3A   | -26.12(13)  | C1    | C2    | C3    | Mn    | -58.89(10)  |
| C21   | P     | C3    | Mn    | -170.16(9)  | C1    | C2    | C3    | P     | 179.01(11)  |
| C21   | P     | C3    | C2    | -75.09(14)  | C1    | C2    | C3    | C3A   | 6.32(15)    |
| C21   | P     | C3    | C3A   | 96.38(13)   | Mn    | C3    | C3A   | C4    | -121.04(17) |
| C24   | P     | C3    | Mn    | -56.20(11)  | Mn    | C3    | C3A   | C7A   | 59.04(10)   |
| C24   | P     | C3    | C2    | 38.87(15)   | P     | C3    | C3A   | Mn    | 122.83(11)  |
| C24   | P     | C3    | C3A   | -149.66(12) | P     | C3    | C3A   | C4    | 1.8(2)      |
| S     | P     | C21   | C22   | -34.97(14)  | P     | C3    | C3A   | C7A   | -178.13(10) |
| S     | P     | C21   | C23   | 88.85(13)   | C2    | C3    | C3A   | Mn    | -63.99(9)   |

**Table 5c.** Torsional Angles for **5**. (continued)

| Atom1 | Atom2 | Atom3 | Atom4 | Angle       | Atom1 | Atom2 | Atom3 | Atom4 | Angle       |
|-------|-------|-------|-------|-------------|-------|-------|-------|-------|-------------|
| C2    | C3    | C3A   | C4    | 174.98(15)  | C4    | C3A   | C7A   | Mn    | 122.81(13)  |
| C2    | C3    | C3A   | C7A   | -4.95(15)   | C4    | C3A   | C7A   | C1    | -178.11(13) |
| Mn    | C3A   | C4    | C5    | 85.07(18)   | C4    | C3A   | C7A   | C7    | 2.5(2)      |
| C3    | C3A   | C4    | C5    | 178.74(15)  | C3A   | C4    | C5    | C6    | -0.3(2)     |
| C7A   | C3A   | C4    | C5    | -1.3(2)     | C4    | C5    | C6    | C7    | 1.0(3)      |
| Mn    | C3A   | C7A   | C1    | 59.08(10)   | C5    | C6    | C7    | C7A   | 0.1(3)      |
| Mn    | C3A   | C7A   | C7    | -120.34(15) | C6    | C7    | C7A   | Mn    | -89.9(2)    |
| C3    | C3A   | C7A   | Mn    | -57.25(10)  | C6    | C7    | C7A   | C1    | 178.86(16)  |
| C3    | C3A   | C7A   | C1    | 1.83(16)    | C6    | C7    | C7A   | C3A   | -1.9(2)     |
| C3    | C3A   | C7A   | C7    | -177.59(14) |       |       |       |       |             |

**Table 6c.** Least-Squares Planes for **5**.

| Plane | Coefficients <sup>a</sup> |          |           | Defining Atoms with Deviations (Å) <sup>b</sup> |             |
|-------|---------------------------|----------|-----------|-------------------------------------------------|-------------|
| 1     | 6.346(4)                  | 9.055(7) | -6.941(5) | 0.9955(16)                                      |             |
|       |                           |          |           | C1                                              | 0.0035(12)  |
|       |                           |          |           | C2                                              | 0.0527(11)  |
|       |                           |          |           | C3                                              | -0.0534(11) |
|       |                           |          |           | C3A                                             | -0.0139(13) |
|       |                           |          |           | C4                                              | 0.0172(12)  |
|       |                           |          |           | C5                                              | 0.0251(13)  |
|       |                           |          |           | C6                                              | -0.0040(14) |
|       |                           |          |           | C7                                              | -0.0211(13) |
|       |                           |          |           | C7A                                             | -0.0061(14) |
|       |                           |          |           | <u>Mn</u>                                       | -1.7858(8)  |
|       |                           |          |           | <u>P</u>                                        | -0.0274(18) |
|       |                           |          |           | <u>N</u>                                        | 0.1304(18)  |

<sup>a</sup>Coefficients are for the form  $ax+by+cz = d$  where  $x$ ,  $y$  and  $z$  are crystallographic coordinates.

<sup>b</sup>Underlined atoms were not included in the definition of the plane.

**Table 7c.** Anisotropic Displacement Parameters ( $U_{ij}$ , Å<sup>2</sup>) for **5**.

| Atom | $U_{11}$    | $U_{22}$    | $U_{33}$    | $U_{23}$     | $U_{13}$     | $U_{12}$    |
|------|-------------|-------------|-------------|--------------|--------------|-------------|
| Mn   | 0.01762(12) | 0.02378(13) | 0.02805(13) | 0.00005(8)   | -0.00052(9)  | -0.00234(8) |
| S    | 0.0462(3)   | 0.0317(2)   | 0.0512(3)   | -0.01946(19) | -0.0177(2)   | 0.01067(18) |
| P    | 0.02365(19) | 0.02203(18) | 0.02543(19) | -0.00339(14) | -0.00396(14) | 0.00527(14) |
| O11  | 0.0505(8)   | 0.0306(7)   | 0.0665(9)   | -0.0011(6)   | -0.0090(7)   | -0.0149(6)  |
| O12  | 0.0454(8)   | 0.0931(12)  | 0.0363(7)   | 0.0205(7)    | -0.0085(6)   | -0.0283(8)  |
| O13  | 0.0245(7)   | 0.0851(12)  | 0.0827(11)  | -0.0200(9)   | 0.0111(7)    | 0.0044(7)   |
| N    | 0.0222(6)   | 0.0238(6)   | 0.0311(6)   | -0.0065(5)   | -0.0038(5)   | -0.0009(5)  |
| C1   | 0.0242(7)   | 0.0198(7)   | 0.0400(8)   | -0.0017(6)   | -0.0015(6)   | 0.0007(5)   |
| C2   | 0.0192(7)   | 0.0189(6)   | 0.0297(7)   | -0.0004(5)   | 0.0009(5)    | -0.0017(5)  |
| C3   | 0.0182(7)   | 0.0193(6)   | 0.0255(7)   | 0.0005(5)    | -0.0008(5)   | -0.0001(5)  |
| C3A  | 0.0208(7)   | 0.0222(7)   | 0.0280(7)   | 0.0043(6)    | -0.0012(5)   | -0.0019(5)  |
| C4   | 0.0302(8)   | 0.0308(8)   | 0.0281(8)   | 0.0025(6)    | -0.0027(6)   | -0.0041(6)  |
| C5   | 0.0360(9)   | 0.0401(9)   | 0.0308(8)   | 0.0091(7)    | -0.0090(7)   | -0.0096(7)  |
| C6   | 0.0307(9)   | 0.0401(9)   | 0.0486(10)  | 0.0177(8)    | -0.0146(7)   | -0.0023(7)  |
| C7   | 0.0291(8)   | 0.0281(8)   | 0.0534(10)  | 0.0093(7)    | -0.0086(7)   | 0.0043(6)   |
| C7A  | 0.0232(7)   | 0.0216(7)   | 0.0379(8)   | 0.0045(6)    | -0.0030(6)   | -0.0003(5)  |
| C11  | 0.0290(8)   | 0.0309(8)   | 0.0366(9)   | 0.0049(6)    | -0.0036(7)   | -0.0038(6)  |
| C12  | 0.0245(8)   | 0.0489(10)  | 0.0375(9)   | 0.0049(7)    | -0.0004(7)   | -0.0146(7)  |
| C13  | 0.0237(8)   | 0.0457(10)  | 0.0440(10)  | -0.0068(8)   | 0.0005(7)    | -0.0042(7)  |
| C21  | 0.0238(8)   | 0.0425(9)   | 0.0282(8)   | -0.0001(7)   | 0.0011(6)    | 0.0062(6)   |
| C22  | 0.0387(10)  | 0.0667(13)  | 0.0438(10)  | -0.0043(9)   | 0.0086(8)    | 0.0215(9)   |
| C23  | 0.0375(10)  | 0.0535(11)  | 0.0367(9)   | 0.0113(8)    | 0.0072(7)    | 0.0039(8)   |
| C24  | 0.0371(9)   | 0.0241(7)   | 0.0281(7)   | 0.0024(6)    | -0.0034(6)   | 0.0044(6)   |
| C25  | 0.0504(12)  | 0.0394(10)  | 0.0603(13)  | 0.0219(9)    | -0.0050(10)  | -0.0019(8)  |
| C26  | 0.0424(10)  | 0.0529(11)  | 0.0391(10)  | 0.0111(8)    | -0.0125(8)   | 0.0084(8)   |
| C27  | 0.0249(8)   | 0.0559(11)  | 0.0499(10)  | -0.0198(9)   | 0.0011(7)    | -0.0108(8)  |
| C28  | 0.0356(9)   | 0.0435(10)  | 0.0390(9)   | -0.0176(8)   | -0.0007(7)   | -0.0016(7)  |

The form of the anisotropic displacement parameter is:

$$\exp[-2\pi^2(h^2a^2U_{11} + k^2b^2U_{22} + l^2c^2U_{33} + 2klb^*c^*U_{23} + 2hla^*c^*U_{13} + 2hka^*b^*U_{12})]$$



**Table 8c.** Derived Atomic Coordinates and Displacement Parameters for Hydrogen Atoms for **5**.

| Atom | <i>x</i> | <i>y</i> | <i>z</i> | $U_{\text{eq}}, \text{\AA}^2$ |
|------|----------|----------|----------|-------------------------------|
| H1   | 0.1182   | 0.2791   | 0.3220   | 0.034                         |
| H4   | 0.1662   | 0.0369   | 0.0521   | 0.036                         |
| H5   | -0.0140  | 0.0963   | -0.0379  | 0.043                         |
| H6   | -0.1357  | 0.2162   | 0.0163   | 0.048                         |
| H7   | -0.0765  | 0.2818   | 0.1604   | 0.044                         |
| H21  | 0.5994   | 0.0861   | 0.2404   | 0.038                         |
| H22A | 0.6577   | -0.0524  | 0.1828   | 0.060                         |
| H22B | 0.7244   | 0.0209   | 0.1180   | 0.060                         |
| H22C | 0.5897   | -0.0293  | 0.0798   | 0.060                         |
| H23A | 0.4561   | 0.1775   | 0.1448   | 0.051                         |
| H23B | 0.4656   | 0.1118   | 0.0566   | 0.051                         |
| H23C | 0.6008   | 0.1617   | 0.0947   | 0.051                         |
| H24  | 0.4079   | 0.0278   | 0.3990   | 0.036                         |
| H25A | 0.2290   | -0.0744  | 0.3749   | 0.060                         |
| H25B | 0.3411   | -0.1077  | 0.4528   | 0.060                         |
| H25C | 0.3406   | -0.1447  | 0.3454   | 0.060                         |
| H26A | 0.6352   | -0.0070  | 0.3531   | 0.054                         |
| H26B | 0.5876   | -0.1038  | 0.3322   | 0.054                         |
| H26C | 0.5872   | -0.0668  | 0.4396   | 0.054                         |
| H27A | 0.5381   | 0.2209   | 0.4288   | 0.052                         |
| H27B | 0.4726   | 0.2712   | 0.3381   | 0.052                         |
| H27C | 0.5276   | 0.1750   | 0.3259   | 0.052                         |
| H28A | 0.3536   | 0.2396   | 0.5217   | 0.047                         |
| H28B | 0.2015   | 0.2104   | 0.4883   | 0.047                         |
| H28C | 0.2699   | 0.2935   | 0.4414   | 0.047                         |
